# Supplementary material for: Glyoxylic acid monohydrate promoted reductive addition of sodium sulfinates to pillar[4]arene[1]quinone
Source: Royal Society of Chemistry journal article supplement (doi:10.1039/d4ob01908c), 2024-12-16

## Supporting Information

# Glyoxylic Acid Monohydrate Promoted Reductive Addition of Sodium Sulfinates to Pillar[4]arene[1]quinone

Enfu Zhang, Da Ma\* and Chenghao Zhu\*

School of Pharmaceutical Engineering & Institute for Advanced Studies, Taizhou University, 1139

Shifu Avenue, Taizhou 318000, Zhejiang, China

E-mail: chhzhu@tzc.edu.cn; dama@tzc.edu.cn

### Table of Contents

|                                                               |     |
|---------------------------------------------------------------|-----|
| 1. General information .....                                  | S2  |
| 2. General procedure for the synthesis of <b>3</b> .....      | S2  |
| 3. Gram scale synthesis and synthetic transformations .....   | S8  |
| 4. Single crystal X-ray diffraction of <b>3i</b> .....        | S10 |
| 8. References .....                                           | S12 |
| 9. <sup>1</sup> H, <sup>19</sup> F, <sup>13</sup> C NMR ..... | S13 |

## 1. General information

$^1\text{H}$  NMR spectra,  $^{19}\text{F}$  NMR spectra,  $^{13}\text{C}$  NMR spectra were recorded on a Bruker 400 MHz spectrometer in  $\text{CDCl}_3$ ,  $\text{CD}_2\text{Cl}_2$  and  $\text{DMSO}-d_6$ . Data for  $^1\text{H}$  NMR spectra are reported as follows: chemical shift (ppm, referenced to TMS; s = singlet, d = doublet, t = triplet, dd = doublet of doublets, m = multiplet), coupling constant (Hz), and integration. Data for  $^{13}\text{C}$  NMR are reported in terms of chemical shift (ppm) relative to residual solvent peak ( $\text{CDCl}_3$ : 77.0 ppm). DCE = 1,2-dichloroethane, PE = petroleum ether, DCM = dichloromethane, EA = ethyl acetate. Pillar[5]arene (**P5**) and pillar[4]arene[1]quinone (**1Q-P5**) were prepared according to literature<sup>[1]</sup>.

## 2. General procedure for the synthesis of 3

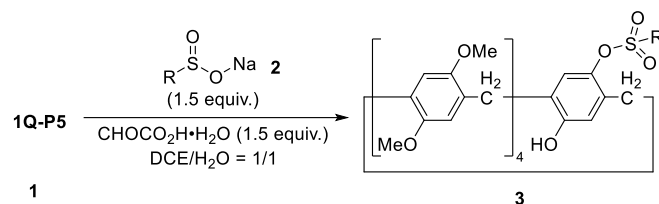

**1Q-P5** (0.2 mmol, 1 equiv.), sodium sulfinate **2** (0.3 mmol, 1.5 equiv.),  $\text{CHOCO}_2\text{H}\cdot\text{H}_2\text{O}$  (0.3 mg, 1.5 equiv.), DCE (3 mL) and  $\text{H}_2\text{O}$  (3 mL) were added to a 10 mL sealing tube. Then the mixture was stirred in a heating mantle temperature at 90 °C for 24 h. The solvent was removed and the residue was purified by silica-gel column chromatography (PE/EA/DCM = 10/1/2) to afford the desired product **3**.

### *1<sup>5</sup>*-hydroxy-3<sup>2</sup>,3<sup>5</sup>,5<sup>2</sup>,5<sup>5</sup>,7<sup>2</sup>,7<sup>5</sup>,9<sup>2</sup>,9<sup>5</sup>-octamethoxy-1,3,5,7,9(1,4)-pentabenzencyclodecaphane-1<sup>2</sup>-yl benzenesulfonate (**3a**)

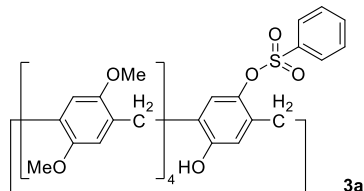

Prepared from the general procedure as a white solid (134.5 mg, 78%).  $^1\text{H}$  NMR (400 MHz,  $\text{CDCl}_3$ )  $\delta$  7.87-7.79 (m, 2H), 7.60 (t,  $J$  = 8.0 Hz, 1H), 7.48 (t,  $J$  = 8.0 Hz, 2H), 7.23 (s, 1H), 6.91 (d,  $J$  = 12.0 Hz, 2H), 6.74-6.72 (m, 3H), 6.66 (s, 1H), 6.57 (s, 1H), 6.52 (d,  $J$  = 8.0 Hz, 3H), 3.80 (s, 3H), 3.76 (d,  $J$  = 4.0 Hz, 6H), 3.71 (s, 3H), 3.68 (s, 2H), 3.63-3.59 (m, 16H), 3.42-3.37 (m, 3H), 3.27 (s, 2H).  $^{13}\text{C}$  NMR (100 MHz,  $\text{CDCl}_3$ )  $\delta$  152.62, 151.91, 150.96, 150.90, 150.72, 150.71, 150.67, 150.63, 148.08, 140.22, 135.84, 134.08, 133.94, 129.60, 128.98, 128.84, 128.39, 128.14, 128.07, 128.00, 127.58, 126.90, 125.90, 125.59, 123.69, 118.52, 114.56, 114.41, 114.25, 114.19, 113.88, 113.60, 112.81, 56.38, 55.96, 55.92, 55.77, 55.74, 55.72, 55.69, 55.61, 30.39, 29.96, 29.72, 29.32, 29.13. HRMS (ESI) calcd. for  $\text{C}_{40}\text{H}_{50}\text{O}_{12}\text{SNa}$   $[\text{M}+\text{Na}]^+$ : 885.2921, found: 885.2921.

### *1<sup>5</sup>*-hydroxy-3<sup>2</sup>,3<sup>5</sup>,5<sup>2</sup>,5<sup>5</sup>,7<sup>2</sup>,7<sup>5</sup>,9<sup>2</sup>,9<sup>5</sup>-octamethoxy-1,3,5,7,9(1,4)-pentabenzencyclodecaphane-1<sup>2</sup>-yl 4-methylbenzenesulfonate (**3b**)

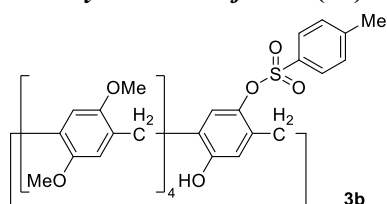

Prepared from the general procedure as a white solid (155.8 mg, 89%). <sup>1</sup>H NMR (400 MHz, CDCl<sub>3</sub>) δ 7.74 (d, *J* = 8.0 Hz, 2H), 7.28 (d, *J* = 8.0 Hz, 2H), 7.20 (s, 1H), 6.95 (s, 1H), 6.90 (s, 1H), 6.76-6.69 (m, 3H), 6.65 (s, 1H), 6.57 (s, 1H), 6.54 (s, 1H), 6.52 (s, 2H), 3.82 (s, 3H), 3.79-3.73 (m, 6H), 3.71 (s, 3H), 3.69 (s, 2H), 3.64-3.60 (m, 15H), 3.42 (s, 3H), 3.27 (s, 2H), 2.40 (s, 3H). <sup>13</sup>C NMR (100 MHz, CDCl<sub>3</sub>) δ 152.61, 151.96, 150.98, 150.93, 150.74, 150.71, 150.68, 150.62, 148.03, 145.05, 140.25, 134.18, 132.96, 129.64, 129.62, 128.84, 128.43, 128.13, 128.06, 128.02, 127.56, 127.00, 125.85, 125.60, 123.86, 118.46, 114.60, 114.45, 114.27, 114.19, 113.86, 113.62, 113.59, 112.80, 56.43, 55.99, 55.96, 55.81, 55.77, 55.72, 55.71, 55.66, 30.43, 30.01, 29.78, 29.34, 29.11, 21.63. HRMS (ESI) calcd. for C<sub>50</sub>H<sub>52</sub>O<sub>12</sub>SNa [M+Na]<sup>+</sup>: 899.3077, found: 899.3078.

***1<sup>5</sup>-hydroxy-3<sup>2,3<sup>5</sup></sup>,5<sup>2,5<sup>5</sup></sup>,7<sup>2,7<sup>5</sup></sup>,9<sup>2,9<sup>5</sup></sup>-octamethoxy-1,3,5,7,9(1,4)-pentabenzencyclodecaphane-1<sup>2</sup>-yl 2-methoxybenzenesulfonate (3c)***

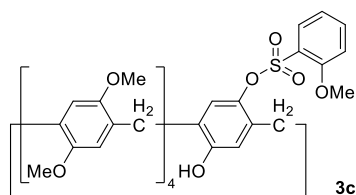

Prepared from the general procedure as a white solid (144.5 mg, 81%). <sup>1</sup>H NMR (400 MHz, CDCl<sub>3</sub>) δ 7.84-7.78 (m, 1H), 7.55-7.47 (m, 1H), 7.05 (s, 1H), 6.97-6.89 (m, 3H), 6.80 (s, 1H), 6.65 (s, 2H), 6.62 (s, 1H), 6.58 (d, *J* = 2.3 Hz, 2H), 6.52 (s, 1H), 6.50 (s, 1H), 6.45 (s, 1H), 3.76 (s, 3H), 3.71-3.69 (m, 9H), 3.62 (s, 3H), 3.59 (s, 2H), 3.56-3.48 (m, 17H), 3.36 (s, 3H). <sup>13</sup>C NMR (100 MHz, CDCl<sub>3</sub>) δ 157.64, 152.29, 151.79, 150.96, 150.85, 150.67, 150.61, 150.56, 148.11, 140.40, 135.98, 134.01, 131.67, 129.43, 128.59, 128.02, 127.94, 127.57, 127.32, 125.71, 125.64, 124.08, 123.47, 120.15, 118.32, 114.45, 114.25, 114.06, 113.77, 113.72, 113.51, 112.80, 112.30, 56.33, 56.02, 55.95, 55.84, 55.76, 55.71, 55.65, 55.61, 30.32, 30.00, 29.71, 29.36, 28.76. HRMS (ESI) calcd. for C<sub>50</sub>H<sub>52</sub>O<sub>13</sub>SNa [M+Na]<sup>+</sup>: 915.3026, found: 915.3032.

***1<sup>5</sup>-hydroxy-3<sup>2,3<sup>5</sup></sup>,5<sup>2,5<sup>5</sup></sup>,7<sup>2,7<sup>5</sup></sup>,9<sup>2,9<sup>5</sup></sup>-octamethoxy-1,3,5,7,9(1,4)-pentabenzencyclodecaphane-1<sup>2</sup>-yl 4-fluorobenzenesulfonate (3d)***

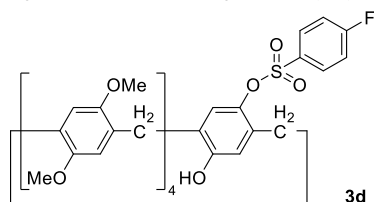

Prepared from the general procedure as a white solid (119.7 mg, 68%). <sup>1</sup>H NMR (400 MHz, CDCl<sub>3</sub>) δ 7.87 (dd, *J* = 8.0, 4.0 Hz, 2H), 7.24 (s, 1H), 7.19 (t, *J* = 8.0 Hz, 2H), 6.92 (d, *J* = 8.0 Hz, 2H), 6.76 (d, *J* = 4.0 Hz, 3H), 6.68 (s, 1H), 6.60 (s, 1H), 6.53 (d, *J* = 4.0 Hz, 3H), 3.82 (s, 3H), 3.76 (d, *J* = 4.0 Hz, 6H), 3.72 (s, 3H), 3.69 (s, 2H), 3.67-3.61 (m, 15H), 3.43 (s, 3H), 3.26 (s, 2H). <sup>19</sup>F NMR (376 MHz, CDCl<sub>3</sub>) δ -102.41, -102.42, -102.43, -102.44, -102.45, -102.46, -102.47, -102.48. <sup>13</sup>C NMR (100 MHz, CDCl<sub>3</sub>) δ 165.88 (d, *J* = 257.0 Hz), 152.75, 151.83, 150.85, 150.79, 150.61, 150.55, 150.52, 148.01, 139.98, 134.08, 131.82 (d, *J* = 3.2 Hz), 131.32 (d, *J* = 9.6 Hz), 129.69, 129.01, 128.16, 128.10, 127.98, 127.57, 126.72, 126.07, 125.46, 123.76, 118.43, 116.46, 116.23, 114.47, 114.25, 114.11, 114.04, 113.74, 113.46, 112.73, 56.36, 55.98, 55.87, 55.75, 55.72, 55.69, 55.63, 55.57, 30.37, 29.91, 29.65, 29.25, 29.06. HRMS (ESI) calcd. for C<sub>49</sub>H<sub>49</sub>FO<sub>12</sub>SNa [M+Na]<sup>+</sup>: 903.2826, found: 903.2830.

***1<sup>5</sup>-hydroxy-3<sup>2</sup>,3<sup>5</sup>,5<sup>2</sup>,5<sup>5</sup>,7<sup>2</sup>,7<sup>5</sup>,9<sup>2</sup>,9<sup>5</sup>-octamethoxy-1,3,5,7,9(1,4)-pentabenzencyclodecaphane-1<sup>2</sup>-yl 4-chlorobenzenesulfonate (3e)***

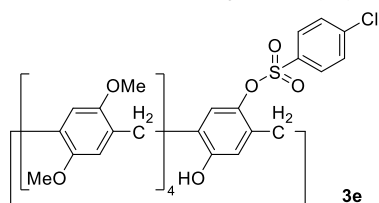

Prepared from the general procedure as a white solid (130.8 mg, 73%). <sup>1</sup>H NMR (400 MHz, CDCl<sub>3</sub>) δ 7.74 (d, *J* = 8.0 Hz, 2H), 7.41 (d, *J* = 8.0 Hz, 2H), 7.22 (s, 1H), 6.88 (d, *J* = 8.0 Hz, 2H), 6.71 (s, 1H), 6.70 (s, 2H), 6.63 (s, 1H), 6.54 (s, 1H), 6.50 (s, 2H), 6.48 (s, 1H), 3.77 (s, 3H), 3.74-3.73 (m, 6H), 3.67 (s, 3H), 3.65 (s, 2H), 3.63-3.55 (m, 15H), 3.37 (s, 3H), 3.24 (s, 2H). <sup>13</sup>C NMR (100 MHz, CDCl<sub>3</sub>) δ 152.78, 151.86, 150.89, 150.83, 150.66, 150.61, 150.56, 148.00, 140.65, 140.00, 134.25, 133.97, 129.80, 129.59, 129.29, 128.90, 128.09, 128.03, 127.88, 127.48, 126.64, 125.99, 125.39, 123.65, 118.50, 114.52, 114.32, 114.16, 114.10, 113.81, 113.51, 112.75, 56.34, 55.94, 55.87, 55.72, 55.70, 55.65, 55.63, 55.53, 30.33, 29.92, 29.68, 29.27, 29.14. HRMS (ESI) calcd. for C<sub>49</sub>H<sub>49</sub>ClO<sub>12</sub>SNa [M+Na]<sup>+</sup>: 919.2531, found: 919.2537.

***1<sup>5</sup>-hydroxy-3<sup>2</sup>,3<sup>5</sup>,5<sup>2</sup>,5<sup>5</sup>,7<sup>2</sup>,7<sup>5</sup>,9<sup>2</sup>,9<sup>5</sup>-octamethoxy-1,3,5,7,9(1,4)-pentabenzencyclodecaphane-1<sup>2</sup>-yl 4-bromobenzenesulfonate (3f)***

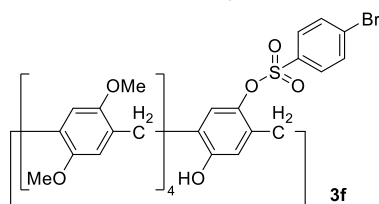

Prepared from the general procedure as a white solid (137.3 mg, 73%). <sup>1</sup>H NMR (400 MHz, CDCl<sub>3</sub>) δ 7.70 (d, *J* = 8.0 Hz, 2H), 7.61 (d, *J* = 8.0 Hz, 2H), 7.24 (s, 1H), 6.91 (d, *J* = 8.0 Hz, 2H), 6.73 (s, 3H), 6.66 (s, 1H), 6.57 (s, 1H), 6.53 (s, 2H), 6.51 (s, 1H), 3.80 (s, 3H), 3.77-3.76 (m, 6H), 3.70 (s, 3H), 3.68 (s, 2H), 3.66-3.58 (m, 15H), 3.40 (s, 3H), 3.29 (s, 2H). <sup>13</sup>C NMR (100 MHz, CDCl<sub>3</sub>) δ 152.79, 151.88, 150.92, 150.85, 150.69, 150.64, 150.59, 148.07, 140.02, 134.85, 133.98, 132.30, 129.84, 129.63, 129.25, 128.94, 128.14, 128.07, 127.94, 127.54, 126.68, 126.03, 125.45, 123.63, 118.54, 114.54, 114.34, 114.19, 114.14, 113.86, 113.56, 112.79, 56.35, 55.95, 55.89, 55.72, 55.69, 55.66, 55.56, 30.35, 29.93, 29.68, 29.30, 29.18. HRMS (ESI) calcd. for C<sub>49</sub>H<sub>49</sub>BrO<sub>12</sub>SNa [M+Na]<sup>+</sup>: 963.2026, found: 963.2027.

***1<sup>5</sup>-hydroxy-3<sup>2</sup>,3<sup>5</sup>,5<sup>2</sup>,5<sup>5</sup>,7<sup>2</sup>,7<sup>5</sup>,9<sup>2</sup>,9<sup>5</sup>-octamethoxy-1,3,5,7,9(1,4)-pentabenzencyclodecaphane-1<sup>2</sup>-yl 3-bromobenzenesulfonate (3g)***

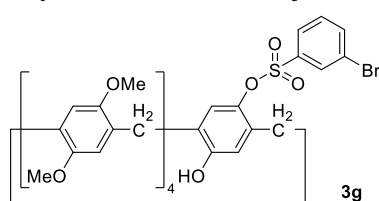

Prepared from the general procedure as a white solid (141.1 mg, 75%). <sup>1</sup>H NMR (400 MHz, CDCl<sub>3</sub>) δ 8.04 (d, *J* = 1.6 Hz, 1H), 7.78 (dd, *J* = 8.0, 0.9 Hz, 2H), 7.38 (t, *J* = 8.0 Hz, 1H), 7.28 (s, 1H), 6.91 (s, 1H), 6.88 (s, 1H), 6.74 (s, 3H), 6.67 (s, 1H), 6.58 (s, 1H), 6.56 (s, 1H), 6.54 (s, 1H), 6.51 (s, 1H), 3.82 (s, 3H), 3.77-3.76 (d, *J* = 2.6 Hz, 6H), 3.72 (s, 3H), 3.69 (s, 2H), 3.67-3.61 (m, 15H), 3.42 (s,

3H), 3.33 (s, 2H).  $^{13}\text{C}$  NMR (100 MHz,  $\text{CDCl}_3$ )  $\delta$  152.87, 151.90, 150.93, 150.86, 150.69, 150.65, 150.61, 148.05, 139.98, 137.69, 137.00, 134.02, 131.19, 130.47, 129.63, 128.96, 128.13, 128.07, 127.97, 127.54, 126.95, 126.72, 126.05, 125.44, 123.62, 122.92, 118.65, 114.58, 114.38, 114.21, 114.15, 113.85, 113.56, 112.78, 56.40, 56.01, 55.93, 55.78, 55.75, 55.72, 55.68, 55.59, 30.42, 29.95, 29.72, 29.28, 29.23. HRMS (ESI) calcd. for  $\text{C}_{49}\text{H}_{49}\text{BrO}_{12}\text{SNa}$   $[\text{M}+\text{Na}]^+$ : 963.2026, found: 963.2032.

***1<sup>5</sup>-hydroxy-3<sup>2</sup>,3<sup>5</sup>,5<sup>2</sup>,5<sup>5</sup>,7<sup>2</sup>,7<sup>5</sup>,9<sup>2</sup>,9<sup>5</sup>-octamethoxy-1,3,5,7,9(1,4)-pentabenzencyclodecaphane-1<sup>2</sup>-yl 2-chlorobenzenesulfonate (3h)***

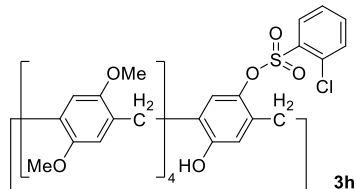

Prepared from the general procedure as a white solid (145.2 mg, 81%).  $^1\text{H}$  NMR (400 MHz,  $\text{CDCl}_3$ )  $\delta$  7.97-7.87 (m, 1H), 7.58-7.45 (m, 2H), 7.30 (t,  $J = 8.0$  Hz, 1H), 7.08 (s, 1H), 6.82 (s, 1H), 6.74 (s, 1H), 6.66 (s, 2H), 6.65 (s, 1H), 6.59 (d,  $J = 4.0$  Hz, 2H), 6.53 (d,  $J = 2.2$  Hz, 2H), 6.43 (s, 1H), 3.73 (s, 3H), 3.70 (s, 6H), 3.64 (s, 3H), 3.57-3.53 (m, 19H), 3.37 (s, 3H).  $^{13}\text{C}$  NMR (100 MHz,  $\text{CDCl}_3$ )  $\delta$  152.69, 151.82, 151.00, 150.89, 150.69, 150.62, 148.15, 140.17, 134.85, 134.56, 134.24, 133.24, 132.07, 129.55, 128.78, 128.14, 128.09, 128.02, 127.57, 127.06, 125.88, 125.53, 123.34, 118.73, 114.49, 114.28, 114.16, 113.80, 113.71, 113.58, 112.81, 56.33, 56.01, 55.92, 55.81, 55.74, 55.72, 55.68, 55.65, 30.37, 29.97, 29.77, 29.68, 29.32. HRMS (ESI) calcd. for  $\text{C}_{49}\text{H}_{49}\text{ClO}_{12}\text{SNa}$   $[\text{M}+\text{Na}]^+$ : 919.2531, found: 919.2532.

***1<sup>5</sup>-hydroxy-3<sup>2</sup>,3<sup>5</sup>,5<sup>2</sup>,5<sup>5</sup>,7<sup>2</sup>,7<sup>5</sup>,9<sup>2</sup>,9<sup>5</sup>-octamethoxy-1,3,5,7,9(1,4)-pentabenzencyclodecaphane-1<sup>2</sup>-yl [1,1'-biphenyl]-4-sulfonate (3i)***

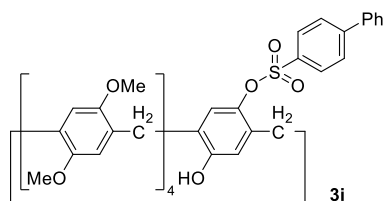

Prepared from the general procedure as a white solid (150.1 mg, 80%).  $^1\text{H}$  NMR (400 MHz,  $\text{CDCl}_3$ )  $\delta$  7.92 (d,  $J = 8.0$  Hz, 2H), 7.70 (d,  $J = 8.0$  Hz, 2H), 7.59 (d,  $J = 8.0$  Hz, 2H), 7.46 (t,  $J = 8.0$  Hz, 2H), 7.43-7.36 (m, 1H), 7.21 (s, 1H), 6.97 (s, 1H), 6.89 (s, 1H), 6.74 (s, 2H), 6.73 (s, 1H), 6.66 (s, 1H), 6.55 (t,  $J = 12.0$  Hz, 4H), 3.78-3.76 (m, 9H), 3.69 (s, 5H), 3.66-3.55 (m, 15H), 3.41 (s, 3H), 3.34 (s, 2H).  $^{13}\text{C}$  NMR (100 MHz,  $\text{CDCl}_3$ )  $\delta$  152.60, 151.81, 150.86, 150.80, 150.65, 150.62, 150.59, 150.55, 148.05, 146.72, 140.13, 138.73, 134.33, 134.10, 129.49, 129.02, 128.90, 128.76, 128.69, 128.07, 128.00, 127.94, 127.52, 127.40, 127.21, 126.83, 125.90, 125.55, 123.75, 118.42, 114.43, 114.27, 114.12, 114.08, 113.77, 113.51, 113.48, 112.74, 56.26, 55.83, 55.68, 55.66, 55.60, 55.54, 30.28, 29.89, 29.66, 29.26, 29.18. HRMS (ESI) calcd. for  $\text{C}_{55}\text{H}_{54}\text{O}_{12}\text{SNa}$   $[\text{M}+\text{Na}]^+$ : 961.3234, found: 961.3233.

***1<sup>5</sup>-hydroxy-3<sup>2,3<sup>5</sup></sup>,5<sup>2,5<sup>5</sup></sup>,7<sup>2,7<sup>5</sup></sup>,9<sup>2,9<sup>5</sup></sup>-octamethoxy-1,3,5,7,9(1,4)-pentabenzencyclodecaphane-1<sup>2</sup>-yl 4-acetamidobenzenesulfonate (3j)***

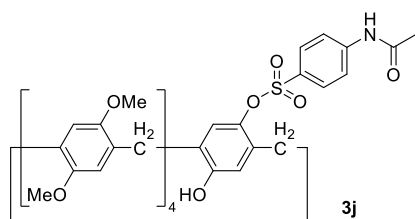

Prepared from the general procedure as a white solid (137.8 mg, 75%). <sup>1</sup>H NMR (400 MHz, CD<sub>2</sub>Cl<sub>2</sub>) δ 7.70 (d, *J* = 8.0 Hz, 3H), 7.62 (d, *J* = 8.0 Hz, 2H), 7.16 (s, 1H), 6.85 (s, 1H), 6.81 (s, 1H), 6.77 (s, 3H), 6.72 (d, *J* = 4.0 Hz, 2H), 6.54 (s, 1H), 6.51 (s, 1H), 6.47 (s, 1H), 3.78-3.43 (m, 32H), 3.22 (s, 2H), 2.06 (s, 3H). <sup>13</sup>C NMR (100 MHz, CD<sub>2</sub>Cl<sub>2</sub>) δ 169.24, 153.15, 152.06, 150.89, 150.86, 150.80, 150.70, 148.57, 143.97, 140.18, 134.46, 130.46, 130.17, 129.77, 129.23, 128.62, 128.56, 128.49, 128.05, 127.23, 126.71, 126.22, 124.39, 119.21, 118.64, 114.38, 114.11, 113.89, 113.84, 113.75, 113.32, 113.02, 56.61, 56.08, 55.99, 55.92, 30.53, 30.09, 29.90, 29.72, 29.53, 29.30, 24.92. HRMS (ESI) calcd. for C<sub>51</sub>H<sub>53</sub>NO<sub>13</sub>SNa [M+Na]<sup>+</sup>: 942.3135, found: 942.3129.

***1<sup>5</sup>-hydroxy-3<sup>2,3<sup>5</sup></sup>,5<sup>2,5<sup>5</sup></sup>,7<sup>2,7<sup>5</sup></sup>,9<sup>2,9<sup>5</sup></sup>-octamethoxy-1,3,5,7,9(1,4)-pentabenzencyclodecaphane-1<sup>2</sup>-yl naphthalene-1-sulfonate (3k)***

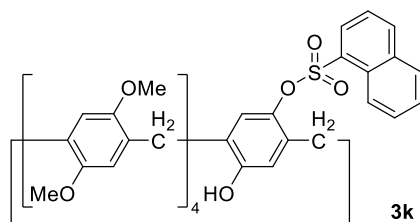

Prepared from the general procedure as a white solid (147.8 mg, 81%). <sup>1</sup>H NMR (400 MHz, CDCl<sub>3</sub>) δ 8.85 (d, *J* = 8.0 Hz, 1H), 8.19 (d, *J* = 8.0 Hz, 1H), 8.11 (d, *J* = 8.0 Hz, 1H), 7.94 (d, *J* = 8.0 Hz, 1H), 7.66 (t, *J* = 8.0 Hz, 1H), 7.59 (t, *J* = 8.0 Hz, 1H), 7.49 (t, *J* = 8.0 Hz, 1H), 7.06 (s, 1H), 6.83 (s, 1H), 6.70 (s, 3H), 6.64 (s, 1H), 6.57 (s, 2H), 6.54 (d, *J* = 4.0 Hz, 2H), 6.30 (s, 1H), 3.76-3.74 (m, 6H), 3.71 (s, 3H), 3.65-3.55 (m, 15H), 3.54 (s, 3H), 3.49 (s, 2H), 3.45 (s, 2H), 3.40 (s, 3H). <sup>13</sup>C NMR (100 MHz, CDCl<sub>3</sub>) δ 152.39, 151.70, 150.91, 150.81, 150.66, 150.62, 150.59, 150.55, 148.09, 140.50, 135.32, 134.25, 134.00, 132.03, 130.68, 129.37, 128.80, 128.63, 128.55, 128.09, 128.00, 127.53, 127.09, 127.03, 125.67, 125.57, 125.25, 124.03, 123.17, 118.66, 114.36, 114.17, 114.08, 113.77, 113.58, 113.54, 112.58, 56.20, 55.90, 55.74, 55.70, 55.67, 55.59, 55.55, 30.22, 29.85, 29.69, 29.42, 29.22. HRMS (ESI) calcd. for C<sub>53</sub>H<sub>53</sub>O<sub>12</sub>SNa [M+Na]<sup>+</sup>: 935.3077, found: 935.3076.

***1<sup>5</sup>-hydroxy-3<sup>2,3<sup>5</sup></sup>,5<sup>2,5<sup>5</sup></sup>,7<sup>2,7<sup>5</sup></sup>,9<sup>2,9<sup>5</sup></sup>-octamethoxy-1,3,5,7,9(1,4)-pentabenzencyclodecaphane-1<sup>2</sup>-yl naphthalene-2-sulfonate (3l)***

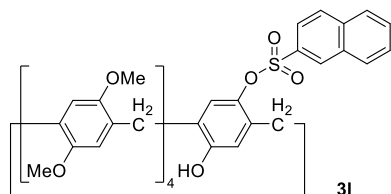

Prepared from the general procedure as a white solid (151.4 mg, 83%). <sup>1</sup>H NMR (400 MHz, CDCl<sub>3</sub>) δ 8.27 (s, 1H), 7.84-7.68 (m, 4H), 7.51 (t, *J* = 8.0 Hz, 1H), 7.44 (t, *J* = 8.0 Hz, 1H), 6.77 (s, 1H),

6.73 (s, 1H), 6.57 (s, 3H), 6.49 (s, 1H), 6.40 (s, 1H), 6.36 (s, 2H), 6.33 (s, 1H), 3.63 (s, 3H), 3.61-3.55 (m, 6H), 3.53 (s, 3H), 3.50 (s, 2H), 3.48-3.37 (m, 15H), 3.23 (s, 3H), 3.13 (s, 2H). <sup>13</sup>C NMR (100 MHz, CDCl<sub>3</sub>) δ 152.64, 151.86, 150.92, 150.85, 150.67, 150.63, 150.58, 148.03, 140.24, 135.26, 134.13, 132.91, 131.80, 130.19, 129.53, 129.41, 129.24, 128.79, 128.10, 128.02, 127.99, 127.92, 127.72, 127.53, 126.89, 125.90, 125.55, 123.76, 123.03, 118.52, 114.51, 114.36, 114.18, 114.12, 113.80, 113.52, 112.74, 56.34, 55.89, 55.75, 55.71, 55.66, 55.59, 30.34, 29.93, 29.72, 29.25. HRMS (ESI) calcd. for C<sub>53</sub>H<sub>53</sub>O<sub>12</sub>SNa [M+Na]<sup>+</sup>: 935.3077, found: 935.3079.

***1<sup>5</sup>-hydroxy-3<sup>2</sup>,3<sup>5</sup>,5<sup>2</sup>,5<sup>5</sup>,7<sup>2</sup>,7<sup>5</sup>,9<sup>2</sup>,9<sup>5</sup>-octamethoxy-1,3,5,7,9(1,4)-pentabenzencyclodecaphane-1<sup>2</sup>-yl 2,3-dihydrobenzo[*b*][1,4]dioxine-6-sulfonate (3m)***

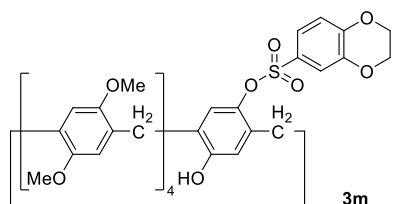

Prepared from the general procedure as a white solid (156.4 mg, 85%). <sup>1</sup>H NMR (400 MHz, CDCl<sub>3</sub>) δ 7.41 (d, *J* = 4.0 Hz, 1H), 7.34 (dd, *J* = 8.0, 4.0 Hz, 1H), 7.22 (s, 1H), 6.96-6.93 (m, 2H), 6.90 (s, 1H), 6.73 (d, *J* = 4.0 Hz, 2H), 6.72 (s, 1H), 6.66 (s, 1H), 6.59 (s, 1H), 6.56 (s, 1H), 6.54 (d, *J* = 4.0 Hz, 2H), 4.27 (d, *J* = 4.0 Hz, 2H), 4.23 (d, *J* = 4.0 Hz, 2H), 3.82 (s, 3H), 3.77-3.76 (d, *J* = 4.0 Hz, 6H), 3.71 (d, *J* = 4.0 Hz, 5H), 3.64-3.60 (m, 15H), 3.44 (s, 3H), 3.35 (s, 2H). <sup>13</sup>C NMR (100 MHz, CDCl<sub>3</sub>) δ 152.59, 151.95, 150.99, 150.92, 150.73, 150.71, 150.67, 150.63, 148.47, 148.03, 143.46, 140.27, 134.17, 129.57, 128.81, 128.10, 128.04, 127.56, 127.07, 125.83, 125.62, 123.86, 122.24, 118.45, 118.09, 117.71, 114.59, 114.47, 114.28, 114.19, 113.85, 113.66, 113.58, 112.82, 64.55, 64.02, 56.43, 56.00, 55.98, 55.82, 55.78, 55.74, 55.69, 30.44, 30.02, 29.80, 29.34, 29.13. HRMS (ESI) calcd. for C<sub>51</sub>H<sub>52</sub>O<sub>14</sub>SNa [M+Na]<sup>+</sup>: 943.2975, found: 943.2977.

***1<sup>5</sup>-hydroxy-3<sup>2</sup>,3<sup>5</sup>,5<sup>2</sup>,5<sup>5</sup>,7<sup>2</sup>,7<sup>5</sup>,9<sup>2</sup>,9<sup>5</sup>-octamethoxy-1,3,5,7,9(1,4)-pentabenzencyclodecaphane-1<sup>2</sup>-yl thiophene-2-sulfonate (3n)***

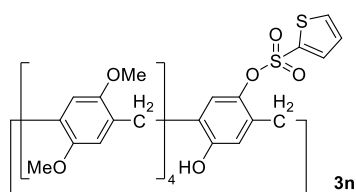

Prepared from the general procedure as a white solid (86.7 mg, 50%). <sup>1</sup>H NMR (400 MHz, CDCl<sub>3</sub>) δ 7.13 (s, 1H), 7.07 (d, *J* = 2.9 Hz, 1H), 6.97 (s, 1H), 6.92 (d, *J* = 4.0 Hz, 1H), 6.90 (s, 1H), 6.77 (d, *J* = 8.0 Hz, 2H), 6.69 (d, *J* = 4.0 Hz, 2H), 6.65-6.58 (m, 3H), 6.57 (s, 1H), 6.46-6.38 (m, 1H), 3.80-3.73 (m, 12H), 3.67-3.66 (m, 5H), 3.63-3.62 (m, 9H), 3.58 (s, 3H), 3.45 (s, 3H), 3.43 (s, 2H). <sup>13</sup>C NMR (100 MHz, CDCl<sub>3</sub>) δ 152.14, 151.79, 150.85, 150.80, 150.72, 150.68, 148.35, 140.91, 135.04, 134.13, 133.84, 133.28, 129.43, 128.79, 128.30, 128.10, 128.08, 127.65, 127.25, 126.69, 125.98, 125.90, 122.54, 119.11, 114.48, 114.42, 114.28, 114.21, 113.99, 113.81, 113.73, 113.19, 56.32, 55.87, 55.75, 55.73, 55.68, 30.35, 29.66, 29.61, 29.39. HRMS (ESI) calcd. for C<sub>47</sub>H<sub>48</sub>O<sub>12</sub>S<sub>2</sub>Na [M+Na]<sup>+</sup>: 891.2485, found: 891.2489.

***1<sup>5</sup>-hydroxy-3<sup>2</sup>,3<sup>5</sup>,5<sup>2</sup>,5<sup>5</sup>,7<sup>2</sup>,7<sup>5</sup>,9<sup>2</sup>,9<sup>5</sup>-octamethoxy-1,3,5,7,9(1,4)-pentabenzencyclodecaphane-1<sup>2</sup>-yl cyclopropanesulfonate (3o)***

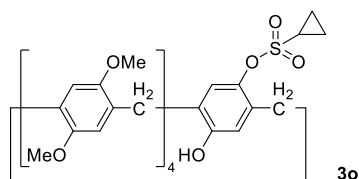

Prepared from the general procedure as a white solid (95.9 mg, 58%). <sup>1</sup>H NMR (400 MHz, CDCl<sub>3</sub>) δ 7.16 (s, 1H), 6.88 (s, 1H), 6.80 (s, 1H), 6.77 (s, 1H), 6.72 (d, *J* = 8.0 Hz, 4H), 6.64 (s, 1H), 6.61 (d, *J* = 4.0 Hz, 2H), 3.76-3.64 (m, 28H), 3.59 (s, 3H), 3.51 (s, 3H), 0.73 (s, 1H), -0.00 (s, 2H), -0.43 (d, *J* = 8.0 Hz, 2H). <sup>13</sup>C NMR (100 MHz, CDCl<sub>3</sub>) δ 151.90, 151.20, 150.91, 150.80, 150.63, 150.53, 150.49, 150.46, 148.52, 141.96, 132.40, 129.28, 129.17, 128.41, 128.28, 128.21, 127.79, 127.07, 126.50, 126.37, 122.43, 119.62, 114.41, 114.22, 114.07, 113.94, 113.85, 113.66, 112.38, 56.34, 55.95, 55.81, 55.71, 55.68, 55.65, 30.63, 29.96, 29.91, 29.81, 28.92, 25.58, 4.90. HRMS (ESI) calcd. for C<sub>46</sub>H<sub>50</sub>O<sub>12</sub>SNa [M+Na]<sup>+</sup>: 849.2921, found: 849.2922.

### 3. Gram scale synthesis and synthetic transformations

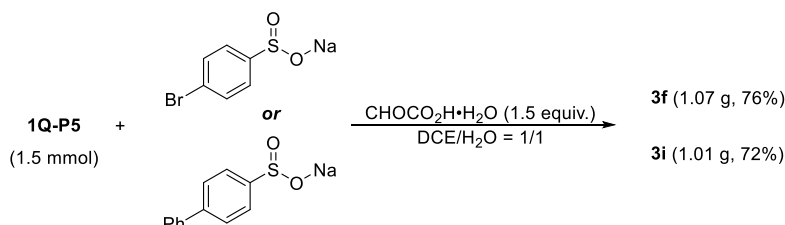

**1Q-P5** (1.5 mmol, 1 equiv.), sodium sulfinates (2.25 mmol, 1.5 equiv.), CHOCO<sub>2</sub>H·H<sub>2</sub>O (2.25 mmol, 1.5 equiv.), DCE (30 mL) and H<sub>2</sub>O (30 mL) were added to a 250 mL sealing tube. Then the mixture was stirred in a heating mantle temperature at 90 °C for 24 h. The solvent was removed and the residue was purified by silica-gel column chromatography (PE/EA/DCM = 10/1/2) to afford the desired product **3f** (1.07 g, 76%) and **3i** (1.01 g, 72%), respectively.

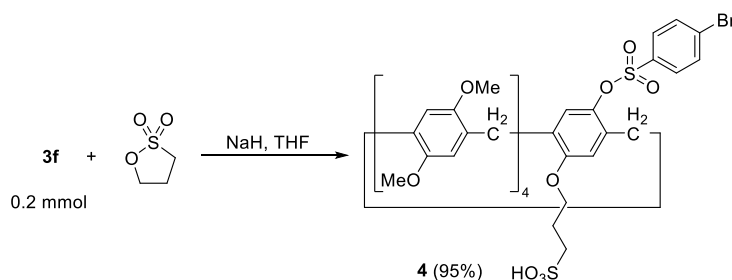

To a solution of **3f** (188 mg, 0.2 mmol, 1 equiv.) in dry THF (4 mL) was added NaH (16.4 mg, 0.41 mmol, 2.05 equiv., 60% dispersion in mineral oil). After stirring for 5 min, 1,3-Propanesultone (51.3 mg, 0.42 mmol, 2.1 equiv.) was added and stirred at room temperature for 3 h. The reaction was quenched with 2d H<sub>2</sub>O, and the solvent was removed under vacuum. The residue was crystallized from petroleum ether/dichloromethane solvent system to afford the desired product **4** as a white solid (201.8 mg, 95%). <sup>1</sup>H NMR (400 MHz, DMSO-*d*<sub>6</sub>) δ 7.98 (d, *J* = 8.0 Hz, 2H), 7.86 (d, *J* = 8.0 Hz, 2H), 6.84 (s, 1H), 6.81-6.71 (m, 6H), 6.69 (s, 1H), 6.65 (s, 1H), 6.57 (s, 1H), 5.66 (s, 1H), 4.06-3.94 (m, 2H), 3.77-3.43 (m, 34H), 2.70 (t, *J* = 8.0 Hz, 2H), 2.17-2.01 (m, 2H). <sup>13</sup>C NMR (100 MHz, DMSO-*d*<sub>6</sub>) δ 154.41, 150.51, 150.39, 150.29, 150.05, 139.96, 134.83, 133.44, 133.15, 130.68, 129.69, 128.92, 128.79, 128.24, 128.13, 127.99, 127.86, 127.83, 127.40, 126.13, 123.43,



114.43, 114.15, 113.68, 113.24, 67.46, 56.08, 56.06, 55.97, 55.93, 55.89, 55.76, 55.29, 48.76, 30.88, 29.38, 28.94, 28.32, 26.06, 22.19, 14.39. HRMS (ESI) calcd. for C<sub>52</sub>H<sub>55</sub>O<sub>15</sub>S<sub>2</sub>BrNa [M+Na]<sup>+</sup>: 1085.2063, found: 1085.2056.

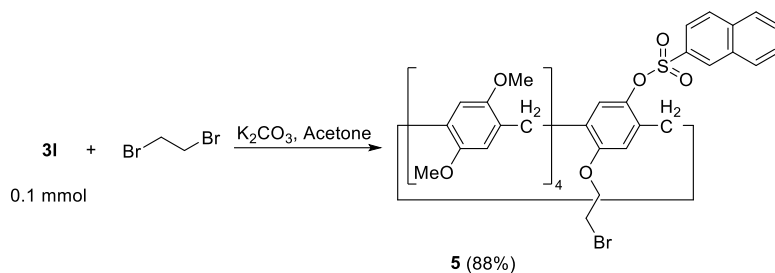

**3I** (91.2 mg, 0.1 mmol, 1 equiv.), 1,2-dibromoethane (40.9 mg, 0.22 mmol, 2.2 equiv.), K<sub>2</sub>CO<sub>3</sub> (22.0 mg, 0.16 mmol, 1.6 equiv.) and acetone (3 mL) were added to a 10 mL sealing tube. Then the mixture was stirred in a heating mantle temperature at 45 °C for 24 h. The solvent was removed and the residue was purified by silica-gel column chromatography (PE/EA = 10/1) to afford the desired product **5** as a white solid (89.6 mg, 88%). <sup>1</sup>H NMR (400 MHz, CD<sub>2</sub>Cl<sub>2</sub>) δ 8.56 (s, 1H), 8.12 (d, *J* = 8.0 Hz, 1H), 8.10-8.03 (m, 2H), 7.97 (dd, *J* = 8.0, 1.5 Hz, 1H), 7.79 (t, *J* = 8.0 Hz, 1H), 7.73 (t, *J* = 8.0 Hz, 1H), 6.98-6.86 (m, 7H), 6.86-6.78 (m, 3H), 4.28 (t, *J* = 8.0 Hz, 2H), 3.80-3.72 (m, 26H), 3.70 (s, 3H), 3.66 (d, *J* = 4.0 Hz, 4H), 3.47 (s, 3H). <sup>13</sup>C NMR (100 MHz, CD<sub>2</sub>Cl<sub>2</sub>) δ 153.76, 150.76, 150.72, 150.66, 150.59, 150.52, 141.44, 135.85, 133.79, 133.75, 132.37, 130.58, 130.02, 129.89, 129.82, 129.26, 128.90, 128.66, 128.52, 128.39, 128.32, 127.57, 126.48, 124.49, 123.34, 114.31, 113.73, 113.68, 113.64, 113.59, 113.53, 113.47, 68.33, 56.04, 55.87, 55.84, 55.81, 55.78, 55.67, 55.59, 31.99, 30.74, 29.53, 29.32, 29.28, 28.64, 23.06. HRMS (ESI) calcd. for C<sub>55</sub>H<sub>55</sub>O<sub>12</sub>SBrNa [M+Na]<sup>+</sup>: 1041.2495, found: 1041.2493.

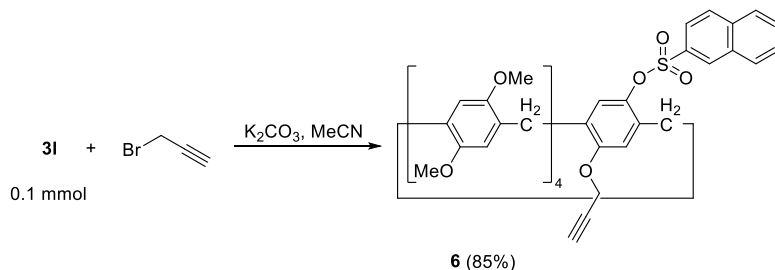

**3I** (91.2 mg, 0.1 mmol, 1 equiv.), 3-bromoprop-1-yne (23.6 mg, 0.2 mmol, 2 equiv.), K<sub>2</sub>CO<sub>3</sub> (41.4 mg, 0.3 mmol, 3 equiv.) and MeCN (2 mL) were added to a 10 mL sealing tube. Then the mixture was stirred in a heating mantle temperature at 80 °C for 24 h. The solvent was removed and the residue was purified by silica-gel column chromatography (PE/EA = 10/1) to afford the desired product **6** as a white solid (80.8 mg, 85%). <sup>1</sup>H NMR (400 MHz, CDCl<sub>3</sub>) δ 8.45 (d, *J* = 1.2 Hz, 1H), 7.98 (d, *J* = 8.0 Hz, 1H), 7.94 (d, *J* = 4.0 Hz, 1H), 7.92 (d, *J* = 4.0 Hz, 1H), 7.89 (dd, *J* = 8.0, 1.8 Hz, 1H), 7.71-7.64 (m, 1H), 7.64-7.57 (m, 1H), 6.85 (s, 1H), 6.78 (s, 1H), 6.77 (s, 1H), 6.75 (s, 1H), 6.75 (s, 1H), 6.70 (s, 1H), 6.66 (s, 1H), 6.64 (s, 1H), 6.62 (s, 1H), 6.59 (s, 1H), 4.36 (d, *J* = 2.3 Hz, 2H), 3.76-3.75 (M, 6H), 3.71-3.50 (m, 25H), 3.47 (s, 3H). <sup>13</sup>C NMR (100 MHz, CDCl<sub>3</sub>) δ 153.19, 150.81, 150.72, 150.62, 150.56, 150.52, 150.36, 140.84, 135.30, 133.40, 133.09, 131.83, 130.24, 129.45, 129.40, 129.32, 129.24, 128.69, 128.66, 128.39, 128.21, 127.97, 127.94, 127.89, 127.75, 126.85, 126.67, 124.56, 122.97, 114.26, 114.22, 114.07, 113.99, 113.83, 113.78, 113.72, 113.56, 77.48, 75.06, 55.85, 55.74, 55.73, 55.63, 55.57, 55.49, 55.20, 30.15, 29.66, 29.57, 29.50. HRMS (ESI) calcd. for C<sub>56</sub>H<sub>54</sub>O<sub>12</sub>SNa [M+Na]<sup>+</sup>: 973.3234, found: 973.3234.

#### 4. Single crystal X-ray diffraction of 3i

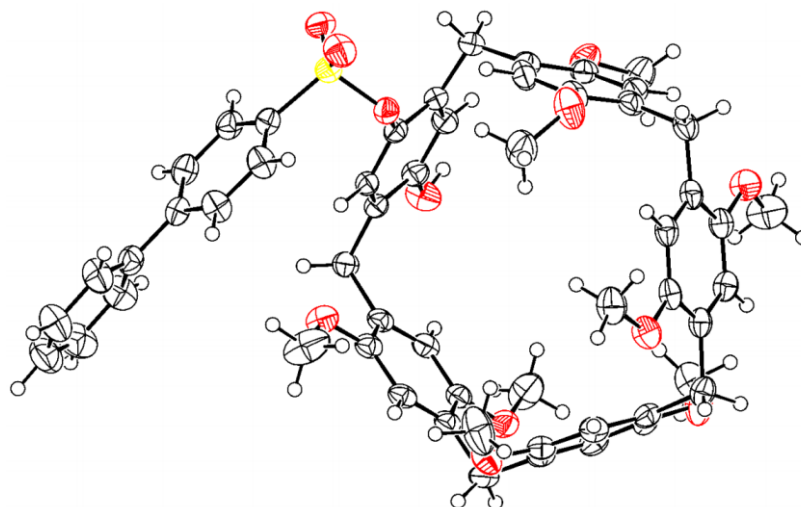

CCDC: 2404953

**Table S1. Crystal data and structure refinement for platon\_sq.**

|                                    |                                                               |
|------------------------------------|---------------------------------------------------------------|
| Identification code                | platon_sq                                                     |
| Empirical formula                  | C <sub>55</sub> H <sub>54</sub> O <sub>12</sub> S             |
| Formula weight                     | 939.04                                                        |
| Temperature/K                      | 170.0                                                         |
| Crystal system                     | monoclinic                                                    |
| Space group                        | P2 <sub>1</sub> /c                                            |
| a/Å                                | 25.9910(19)                                                   |
| b/Å                                | 14.3060(11)                                                   |
| c/Å                                | 14.7845(11)                                                   |
| α/°                                | 90                                                            |
| β/°                                | 94.361(2)                                                     |
| γ/°                                | 90                                                            |
| Volume/Å <sup>3</sup>              | 5481.4(7)                                                     |
| Z                                  | 4                                                             |
| ρ <sub>calc</sub> /cm <sup>3</sup> | 1.138                                                         |
| μ/mm <sup>-1</sup>                 | 0.641                                                         |
| F(000)                             | 1984.0                                                        |
| Crystal size/mm <sup>3</sup>       | 0.12 × 0.12 × 0.12                                            |
| Radiation                          | GaKα (λ = 1.34139)                                            |
| 2θ range for data collection/°     | 7.912 to 105.962                                              |
| Index ranges                       | -30 ≤ h ≤ 30, -17 ≤ k ≤ 16, -17 ≤ l ≤ 17                      |
| Reflections collected              | 75666                                                         |
| Independent reflections            | 9553 [R <sub>int</sub> = 0.0327, R <sub>sigma</sub> = 0.0269] |
| Data/restraints/parameters         | 9553/0/625                                                    |
| Goodness-of-fit on F <sup>2</sup>  | 1.028                                                         |

Final R indexes [ $I \geq 2\sigma(I)$ ]  $R_1 = 0.0391$ ,  $wR_2 = 0.1071$

Final R indexes [all data]  $R_1 = 0.0431$ ,  $wR_2 = 0.1099$

Largest diff. peak/hole /  $e \text{ \AA}^{-3}$  0.24/-0.45

**Table S2. Fractional Atomic Coordinates ( $\times 104$ ) and Equivalent Isotropic Displacement Parameters ( $\text{\AA}^2 \times 103$ ) for *platon\_sq*.  $U_{eq}$  is defined as 1/3 of the trace of the orthogonalised UIJ tensor.**

| Atom  | x         | y          | z          | U(eq)     |
|-------|-----------|------------|------------|-----------|
| S(1)  | 6294.8(2) | 5692.8(3)  | 6918.8(3)  | 35.78(10) |
| O(1)  | 6696.1(4) | 5655.2(7)  | 6157.5(7)  | 34.1(2)   |
| O(2)  | 6093.9(5) | 6631.3(9)  | 2610.1(8)  | 48.4(3)   |
| O(3)  | 6240.2(5) | 3141.4(8)  | 3991.8(8)  | 44.3(3)   |
| O(4)  | 7100.1(4) | 4017.6(8)  | 791.9(8)   | 41.7(3)   |
| O(5)  | 7984.0(5) | 1682.7(8)  | 3249.7(8)  | 44.7(3)   |
| O(6)  | 8975.3(5) | 4514.8(10) | 1527.5(9)  | 54.4(3)   |
| O(7)  | 9432.9(5) | 3380.4(8)  | 4893.6(8)  | 44.1(3)   |
| O(8)  | 9279.5(5) | 7082.1(8)  | 3813.0(8)  | 44.7(3)   |
| O(9)  | 8514.4(5) | 5853.9(10) | 6828.4(9)  | 57.0(3)   |
| O(10) | 7576.7(5) | 8390.9(8)  | 4416.2(8)  | 47.7(3)   |
| O(11) | 5999.2(5) | 6535.5(8)  | 6817.2(8)  | 44.3(3)   |
| O(12) | 6605.5(5) | 5523.4(9)  | 7734.9(8)  | 50.6(3)   |
| C(1)  | 6533.7(5) | 5932.7(10) | 5253.3(10) | 30.1(3)   |
| C(2)  | 6300.6(5) | 5275.9(10) | 4675.8(10) | 30.2(3)   |
| C(3)  | 6151.6(5) | 5506.5(10) | 3779.1(10) | 31.0(3)   |
| C(4)  | 6248.6(6) | 6414.3(11) | 3490.8(11) | 35.2(3)   |
| C(5)  | 6495.9(6) | 7059.7(11) | 4080.2(11) | 36.6(3)   |
| C(6)  | 6647.3(6) | 6832.1(10) | 4974.6(11) | 32.8(3)   |
| C(7)  | 5901.0(6) | 4783.3(11) | 3137.8(11) | 34.8(3)   |
| C(8)  | 6471.6(6) | 3347.2(11) | 3209(1)    | 33.9(3)   |
| C(9)  | 6849.0(6) | 2794.5(10) | 2860.5(10) | 33.8(3)   |
| C(10) | 7055.5(6) | 3019.4(10) | 2047.3(10) | 32.2(3)   |
| C(11) | 6881.9(6) | 3829.7(10) | 1592.9(10) | 33.2(3)   |
| C(12) | 6508.9(6) | 4389.1(10) | 1947.1(11) | 33.8(3)   |
| C(13) | 6298.7(6) | 4156.8(10) | 2750.5(11) | 32.8(3)   |
| C(14) | 7468.3(6) | 2410.4(11) | 1679.7(11) | 36.5(3)   |
| C(15) | 8253.2(6) | 2356.4(10) | 2810.2(10) | 34.0(3)   |
| C(16) | 8743.3(6) | 2657.1(11) | 3115.4(11) | 35.0(3)   |
| C(17) | 8989.5(6) | 3370.5(11) | 2680.5(10) | 33.8(3)   |
| C(18) | 8727.8(6) | 3784.5(11) | 1926.3(11) | 36.8(3)   |
| C(19) | 8248.1(6) | 3452.7(12) | 1597.5(11) | 37.8(4)   |
| C(20) | 8003.9(6) | 2734.9(10) | 2025.7(10) | 33.0(3)   |
| C(21) | 9509.5(6) | 3734.8(11) | 3065.0(11) | 38.1(4)   |
| C(22) | 9388.9(6) | 4311.1(11) | 4652.6(11) | 34.8(3)   |
| C(23) | 9307.5(6) | 5028.9(11) | 5256.0(11) | 35.4(3)   |

|       |            |            |            |         |
|-------|------------|------------|------------|---------|
| C(24) | 9266.5(6)  | 5955.0(11) | 4969.4(10) | 34.4(3) |
| C(25) | 9315.7(6)  | 6149.8(11) | 4055.4(11) | 35.2(3) |
| C(26) | 9404.5(6)  | 5436.9(11) | 3454.4(11) | 35.6(3) |
| C(27) | 9441.0(5)  | 4507.4(11) | 3739.1(11) | 34.4(3) |
| C(28) | 9164.5(6)  | 6728.8(12) | 5630.0(11) | 38.6(4) |
| C(29) | 8284.3(6)  | 6495.2(12) | 6226.5(11) | 39.7(4) |
| C(30) | 7762.3(6)  | 6703.8(12) | 6226.3(11) | 40.8(4) |
| C(31) | 7524.7(6)  | 7339.2(11) | 5621.7(10) | 35.6(3) |
| C(32) | 7832.1(6)  | 7781.7(11) | 5015.2(10) | 35.8(3) |
| C(33) | 8358.3(6)  | 7601.0(11) | 5036.2(10) | 36.1(3) |
| C(34) | 8593.9(6)  | 6951.2(11) | 5638.7(10) | 35.0(3) |
| C(35) | 6947.8(6)  | 7518.4(11) | 5594.1(11) | 38.8(4) |
| C(36) | 5891.8(6)  | 4733.4(11) | 6654.8(10) | 33.4(3) |
| C(37) | 5410.1(6)  | 4850.1(11) | 6203.0(11) | 38.7(4) |
| C(38) | 5121.9(6)  | 4068.0(12) | 5947.3(12) | 40.6(4) |
| C(39) | 5303.4(6)  | 3168.3(11) | 6140.1(11) | 34.8(3) |
| C(40) | 5789.2(6)  | 3073.7(11) | 6606.6(12) | 41.2(4) |
| C(41) | 6082.1(6)  | 3847.1(11) | 6857.3(12) | 41.4(4) |
| C(42) | 5000.7(6)  | 2321.8(12) | 5853.8(11) | 39.0(4) |
| C(43) | 4985.4(8)  | 1552.2(13) | 6423.5(14) | 53.0(5) |
| C(44) | 4719.3(9)  | 748.8(15)  | 6148.4(16) | 63.9(6) |
| C(45) | 4467.2(8)  | 706.1(15)  | 5295.1(17) | 64.6(6) |
| C(46) | 4471.5(8)  | 1461.7(16) | 4729.0(17) | 66.9(6) |
| C(47) | 4736.4(7)  | 2272.0(14) | 5003.6(14) | 53.9(5) |
| C(48) | 6382.8(11) | 2297.9(16) | 4441.0(15) | 74.7(7) |
| C(49) | 7022.9(9)  | 4920.7(14) | 426.3(16)  | 63.3(6) |
| C(50) | 8127.9(10) | 1538.6(19) | 4170.7(15) | 74.3(7) |
| C(51) | 8656.1(8)  | 5209.4(14) | 1092.9(14) | 55.4(5) |
| C(52) | 9343.7(8)  | 3135.9(13) | 5800.3(13) | 52.8(5) |
| C(53) | 9239.1(10) | 7298.3(14) | 2876.1(13) | 61.0(5) |
| C(54) | 8271.8(9)  | 4960.9(14) | 6830.8(16) | 63.3(6) |
| C(55) | 7852.6(8)  | 8763.5(15) | 3710.6(13) | 55.8(5) |

## 5. References

- [1] G. Wang, H. Qiang, Y.-Z. Guo, J. Yang, K. Wen, W.-B. Hu, Systematic rim cyano-functionalization of pillar[5]arene and corresponding host-guest property varieties. *Org. Biomol. Chem.* **2019**, *17*, 4600-4604.

## 6. $^1\text{H}$ , $^{19}\text{F}$ and $^{13}\text{C}$ NMR Spectra of Compounds

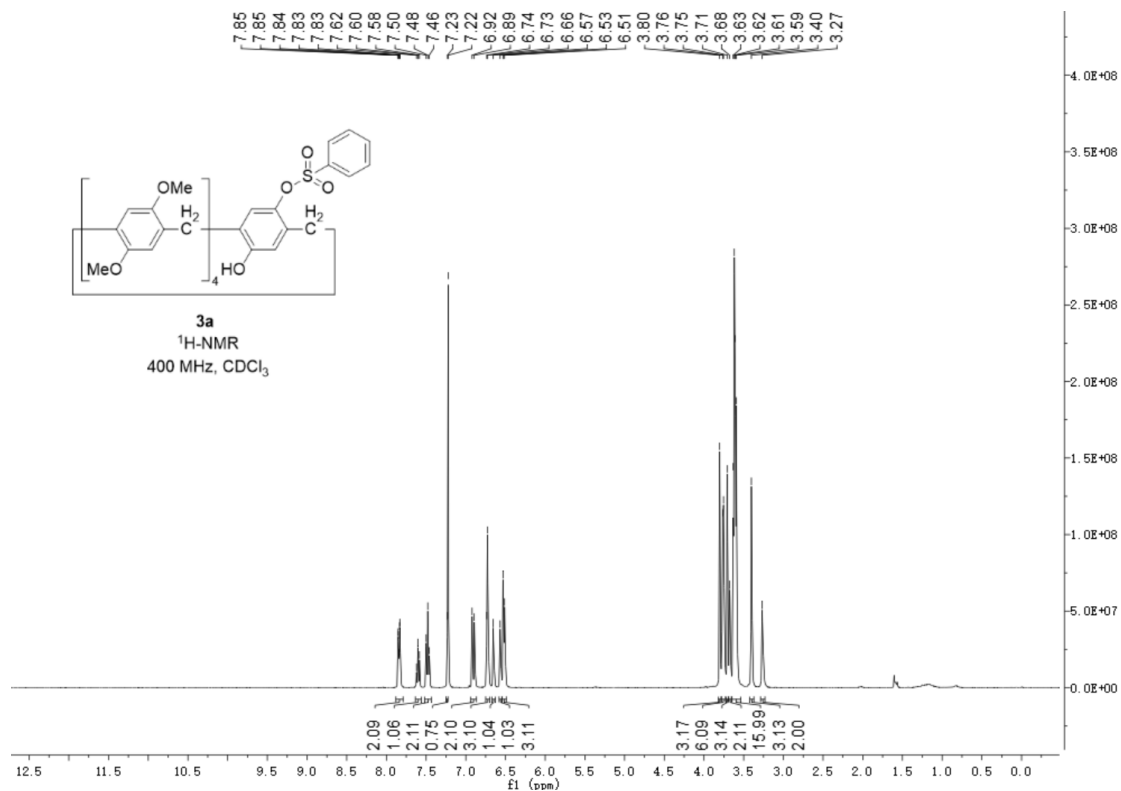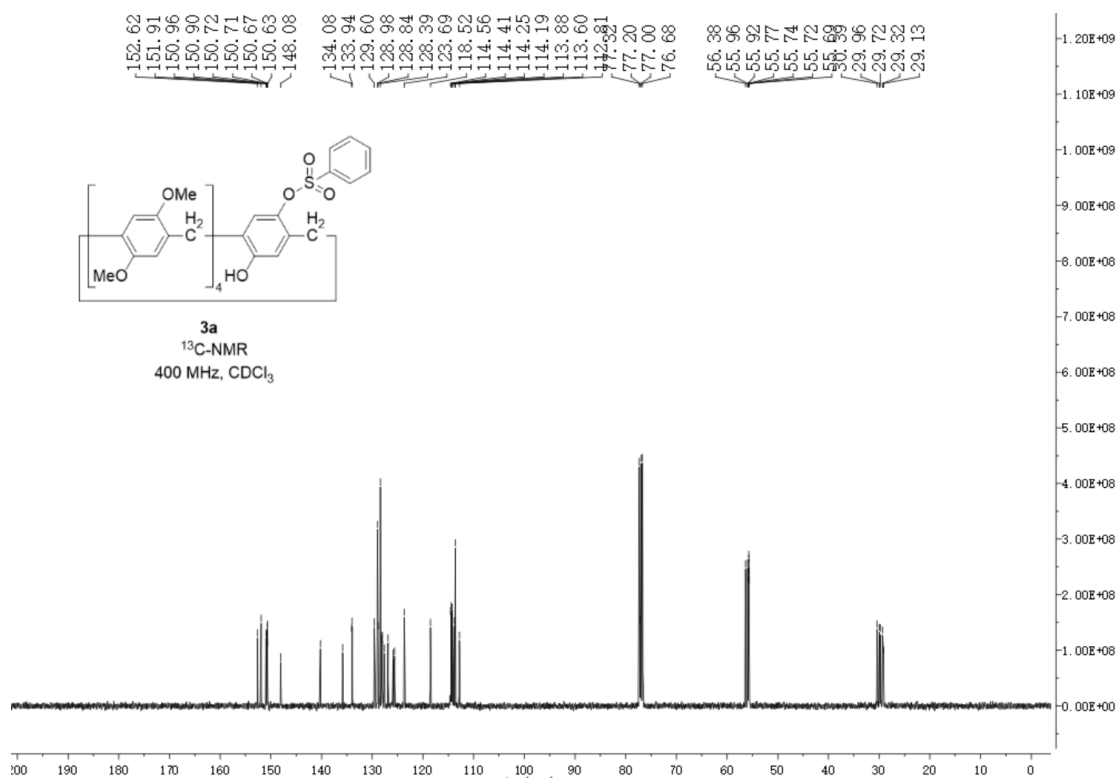

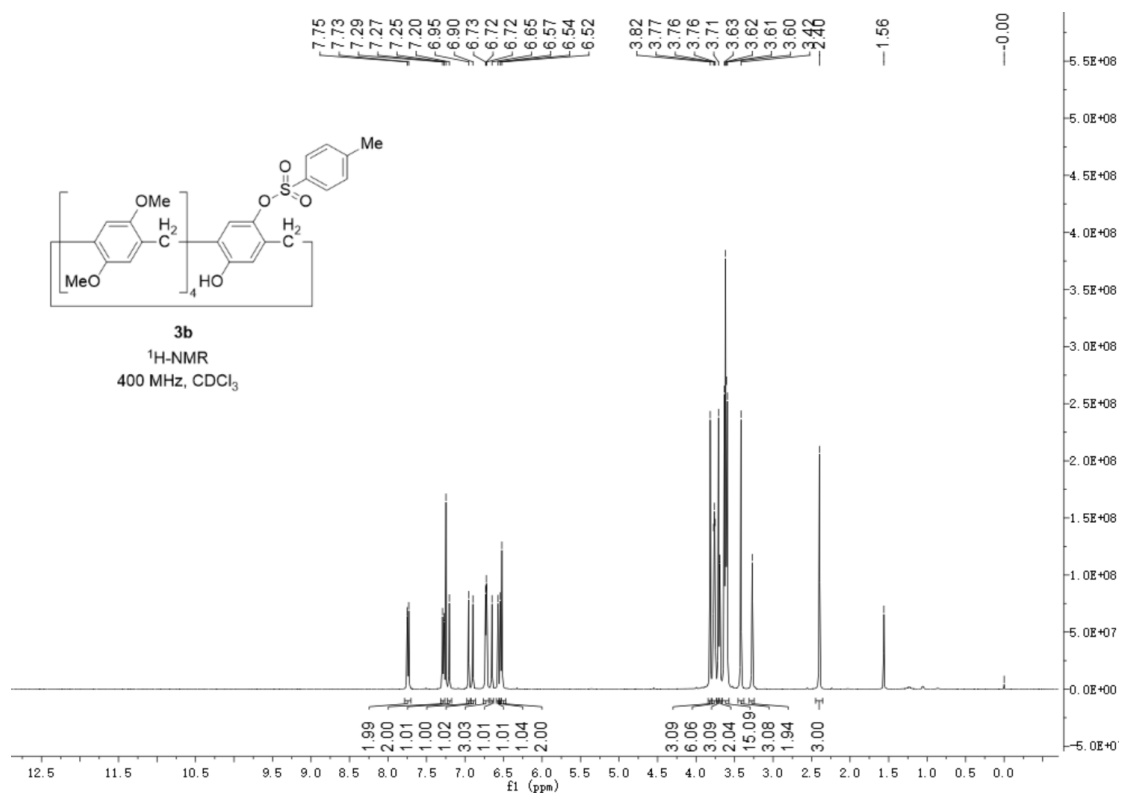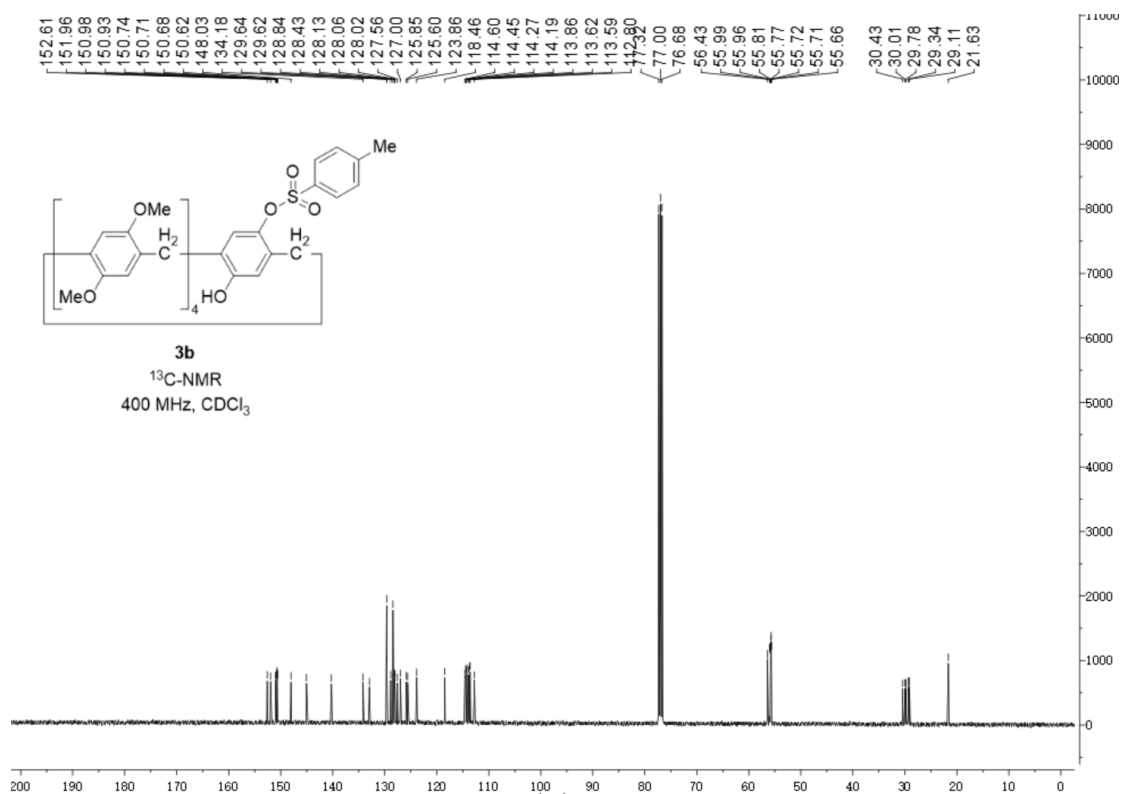

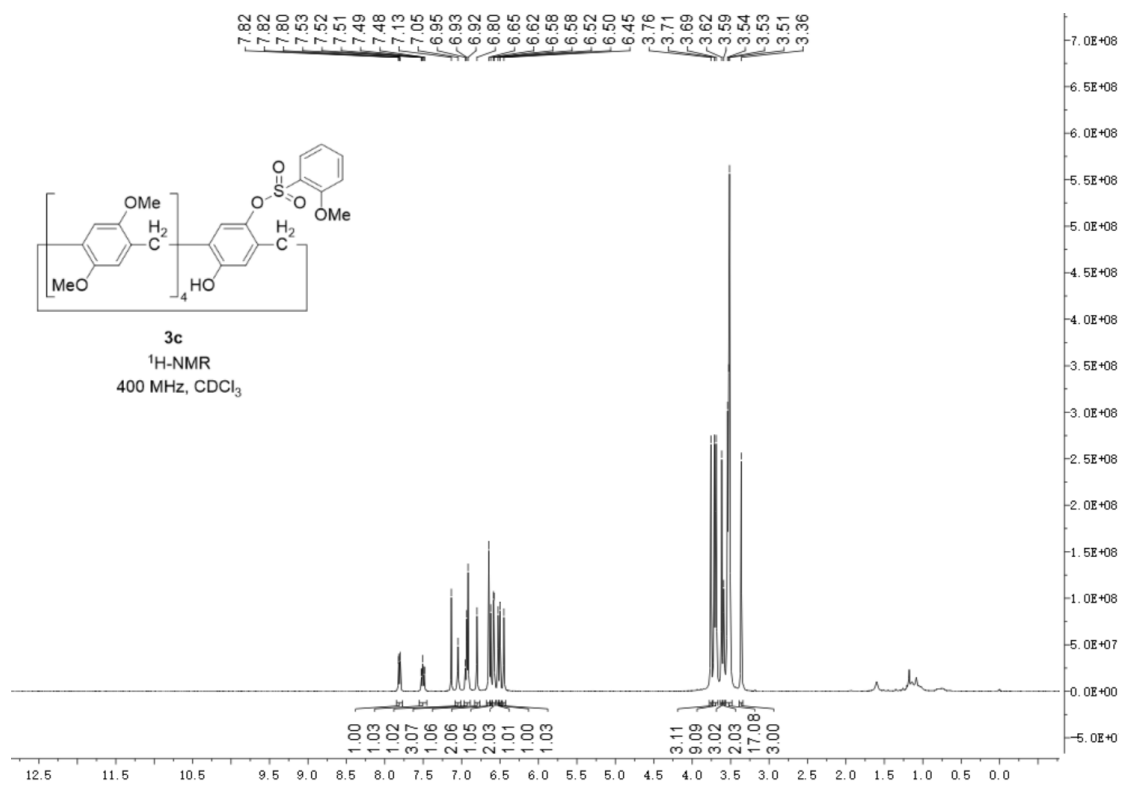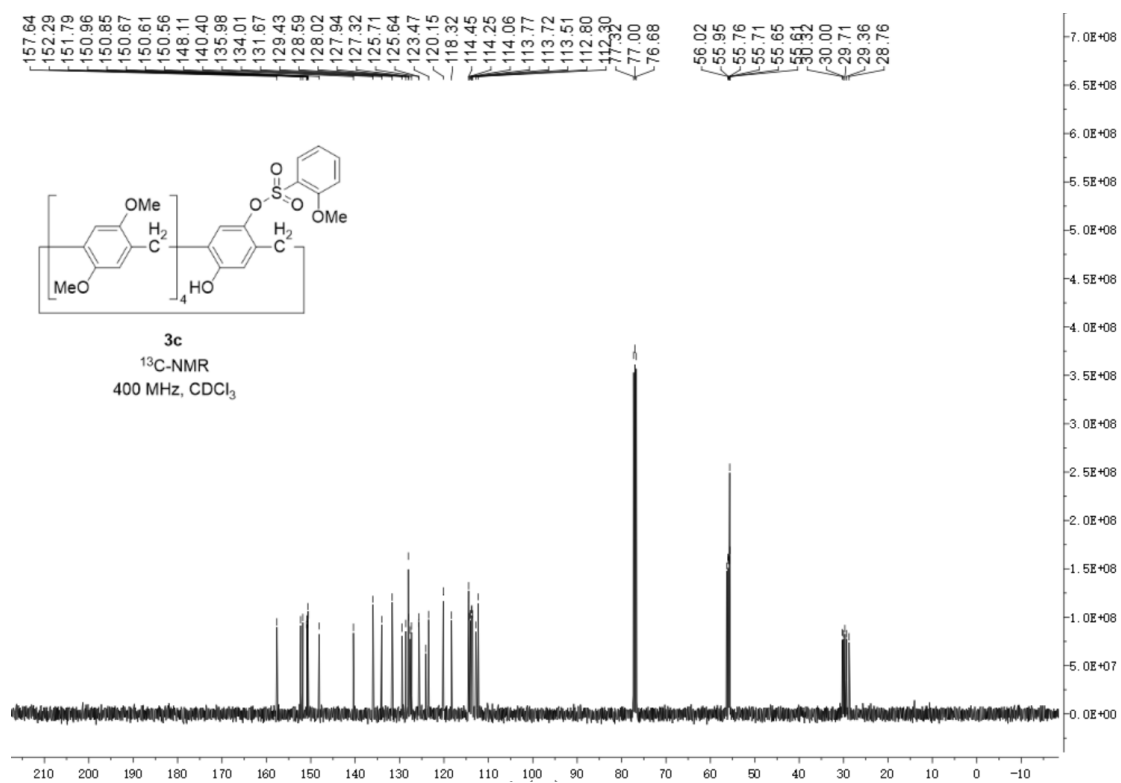

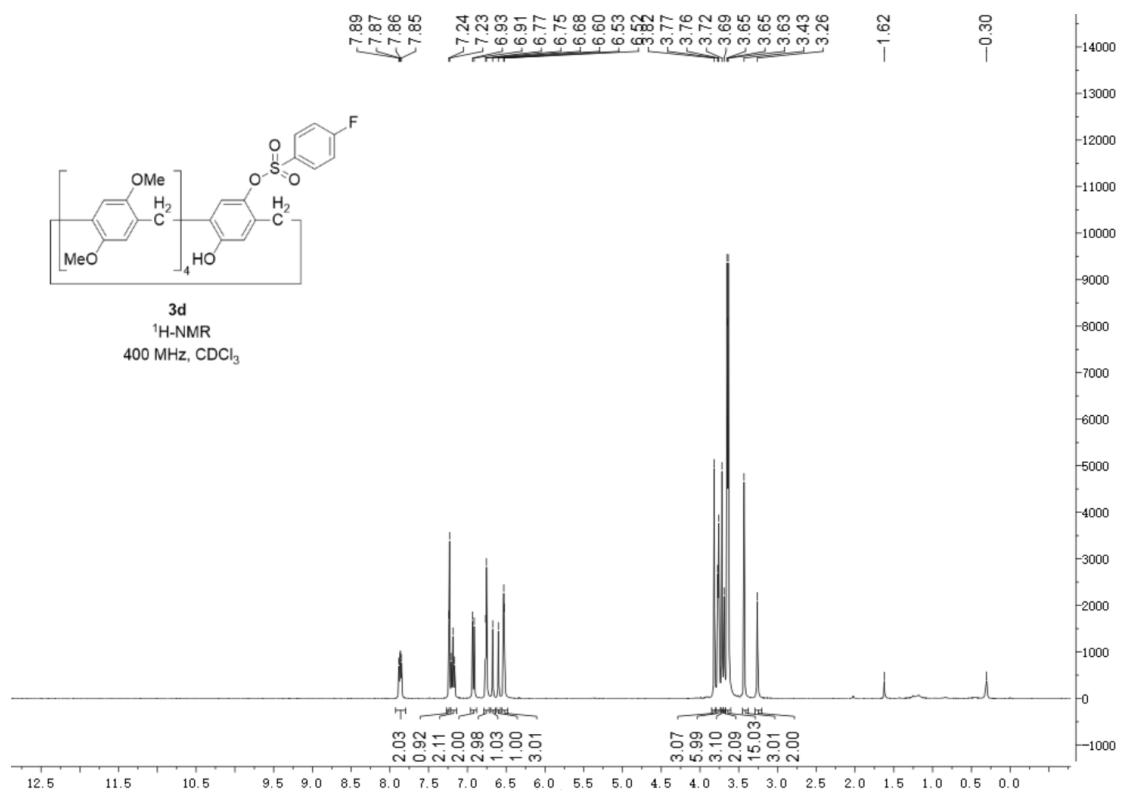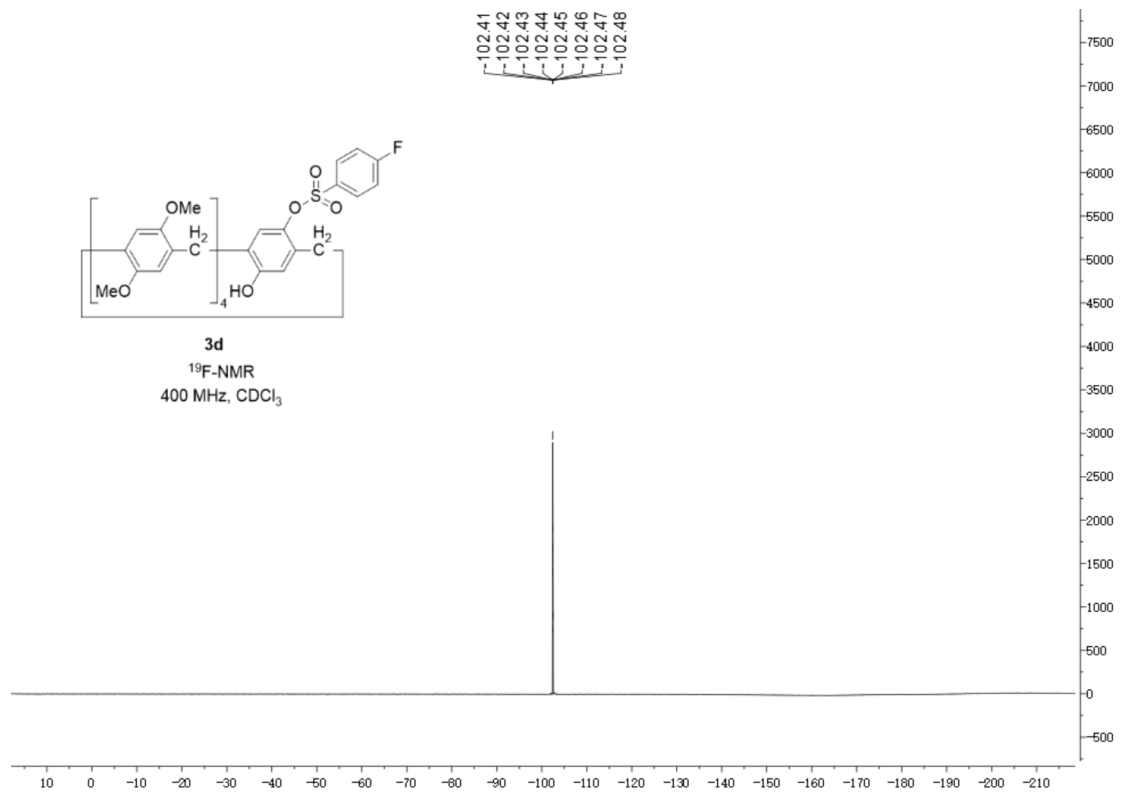



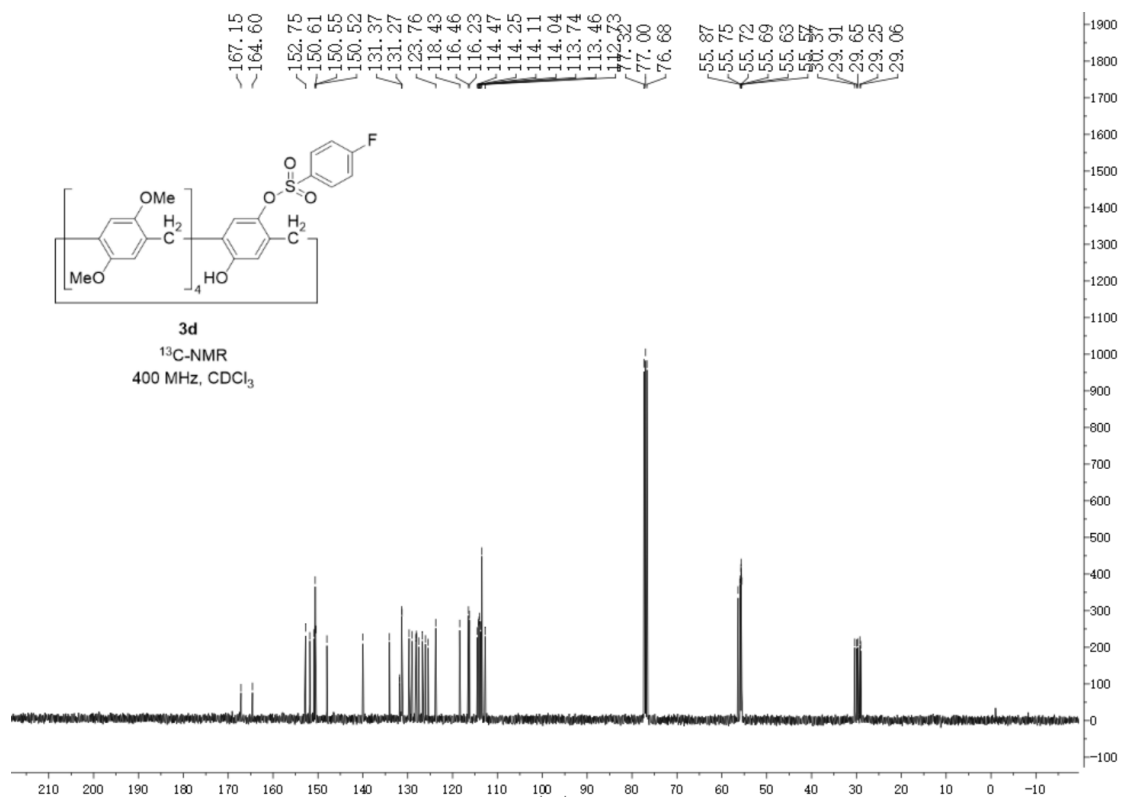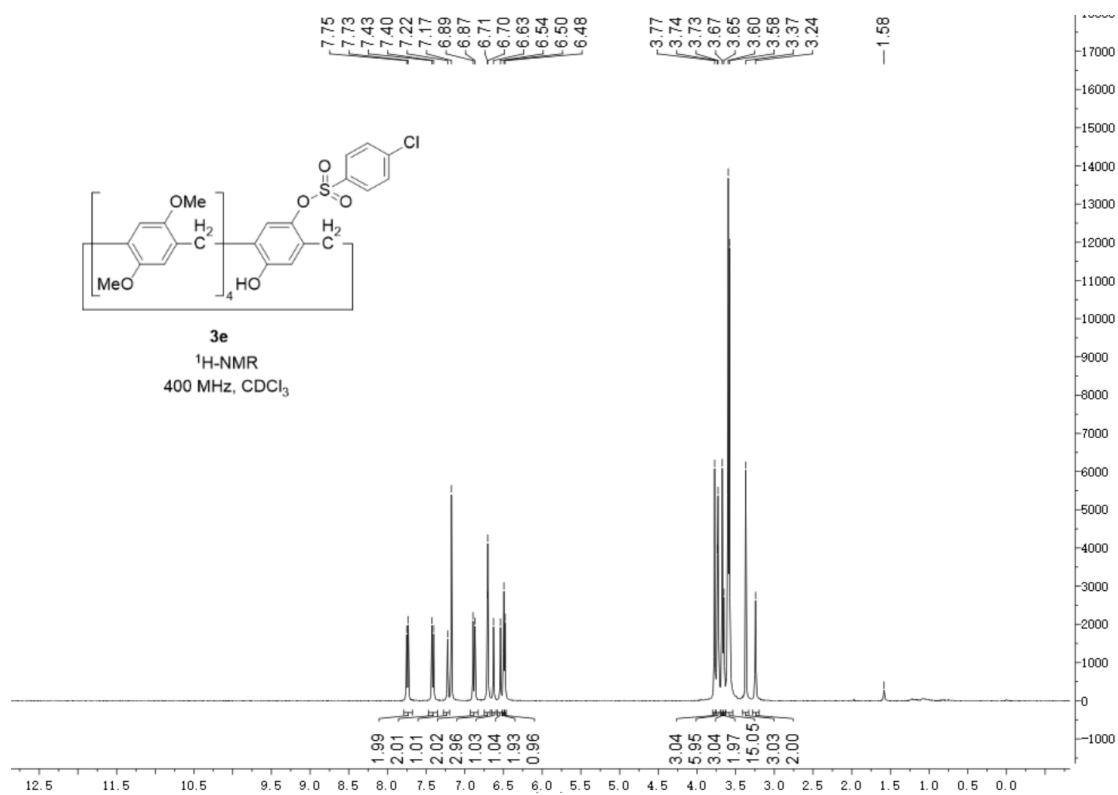

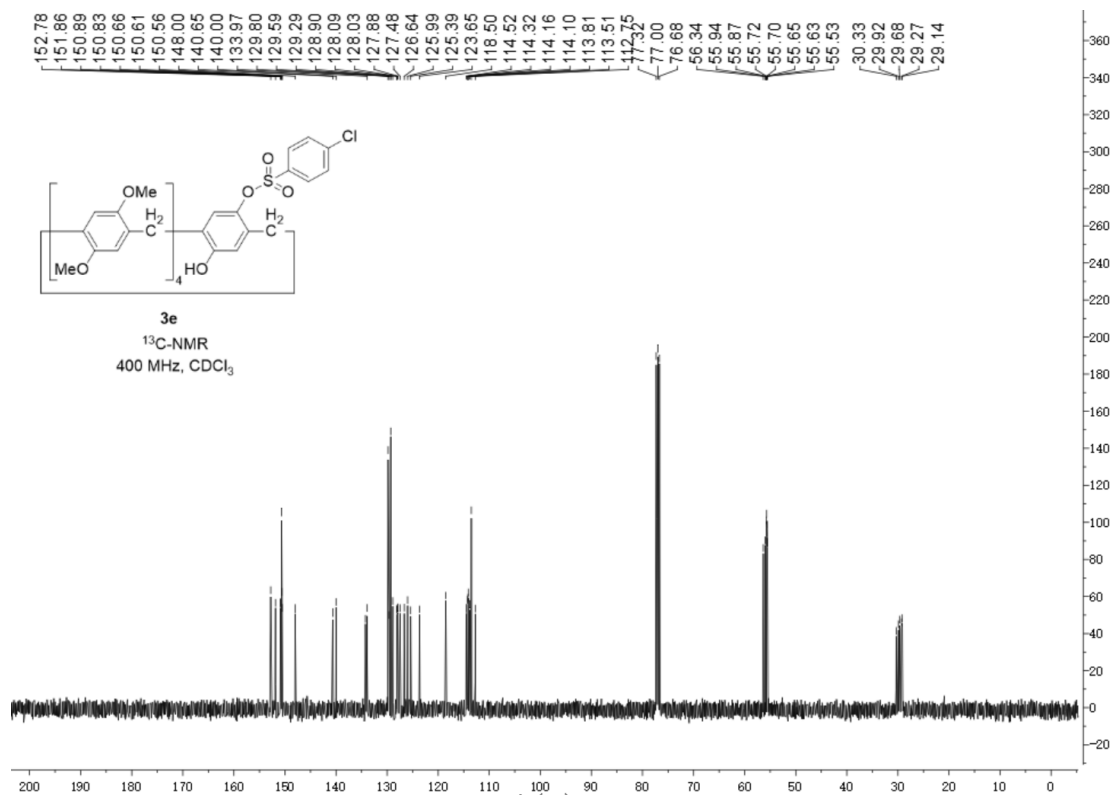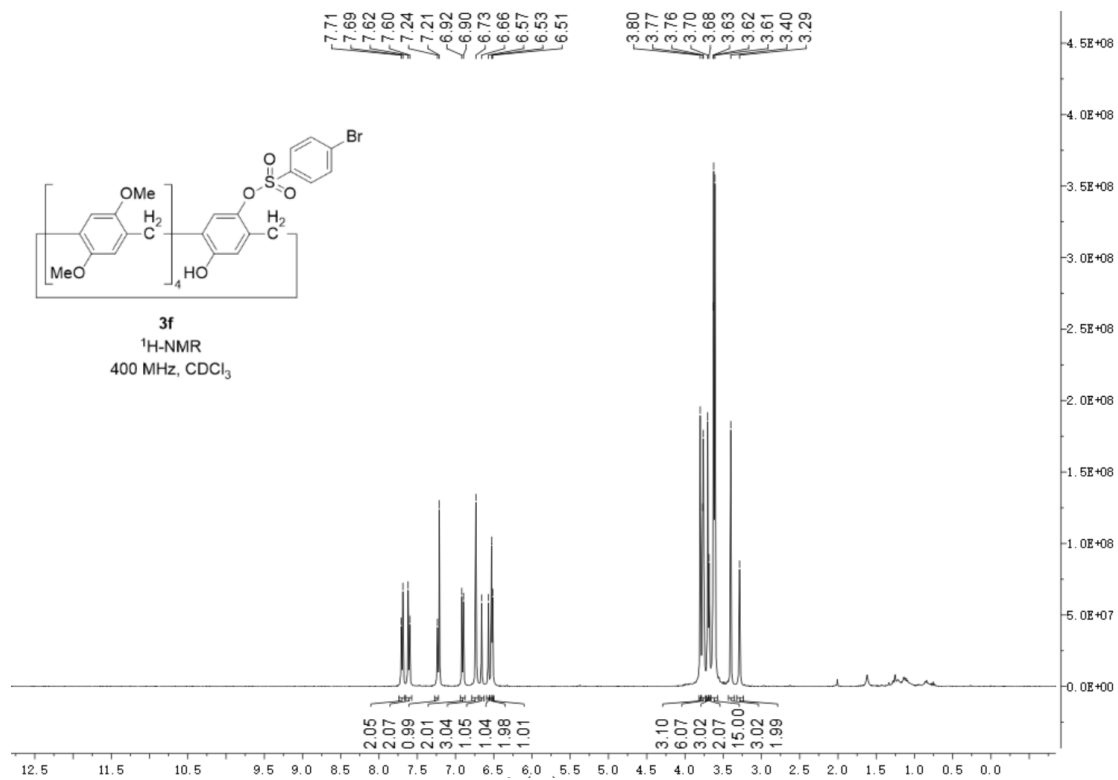

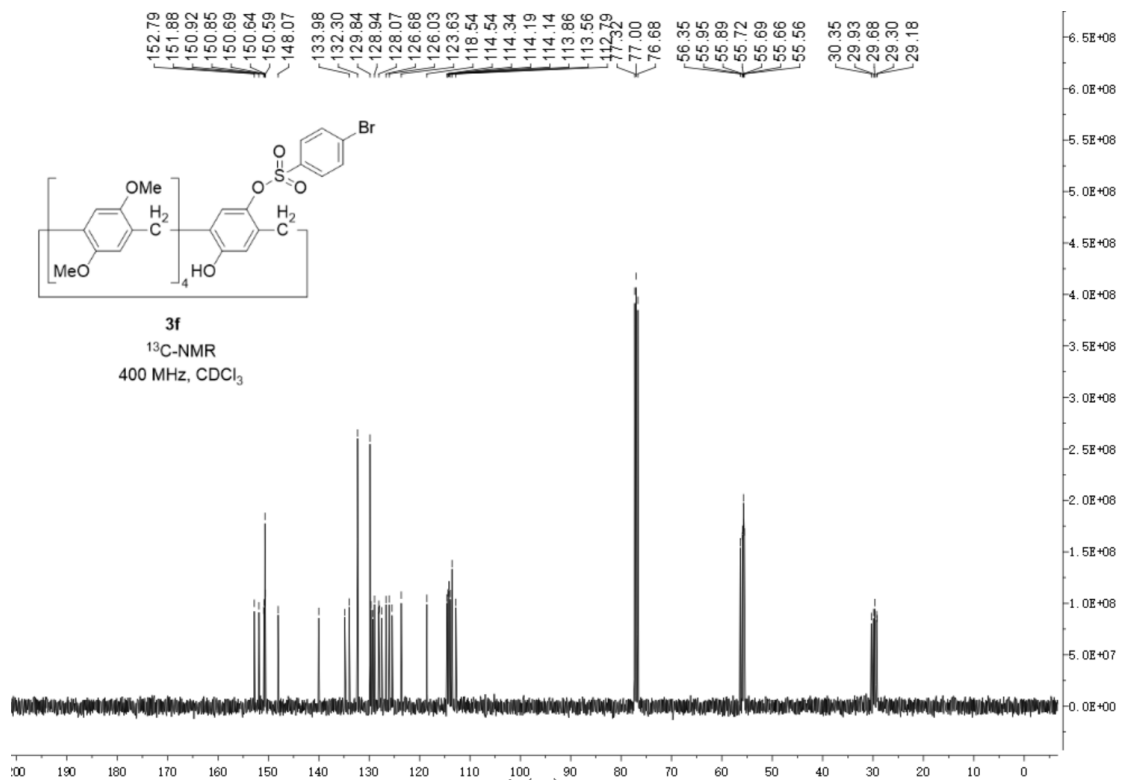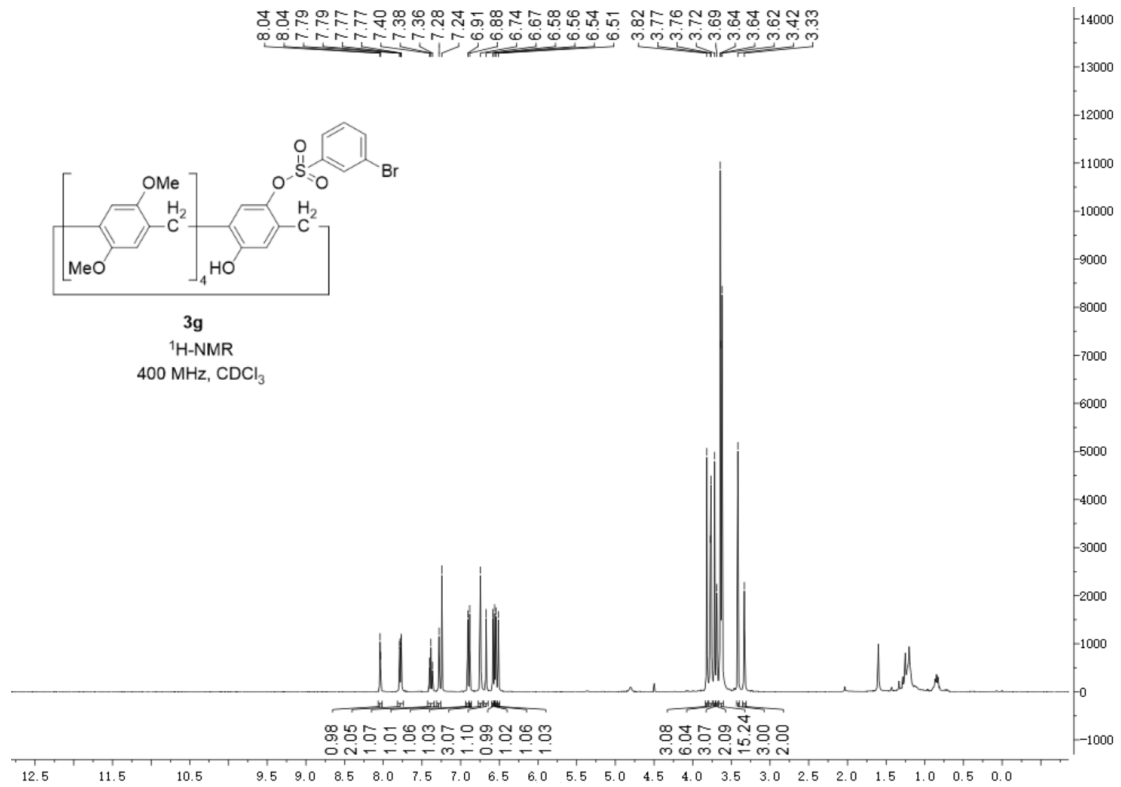

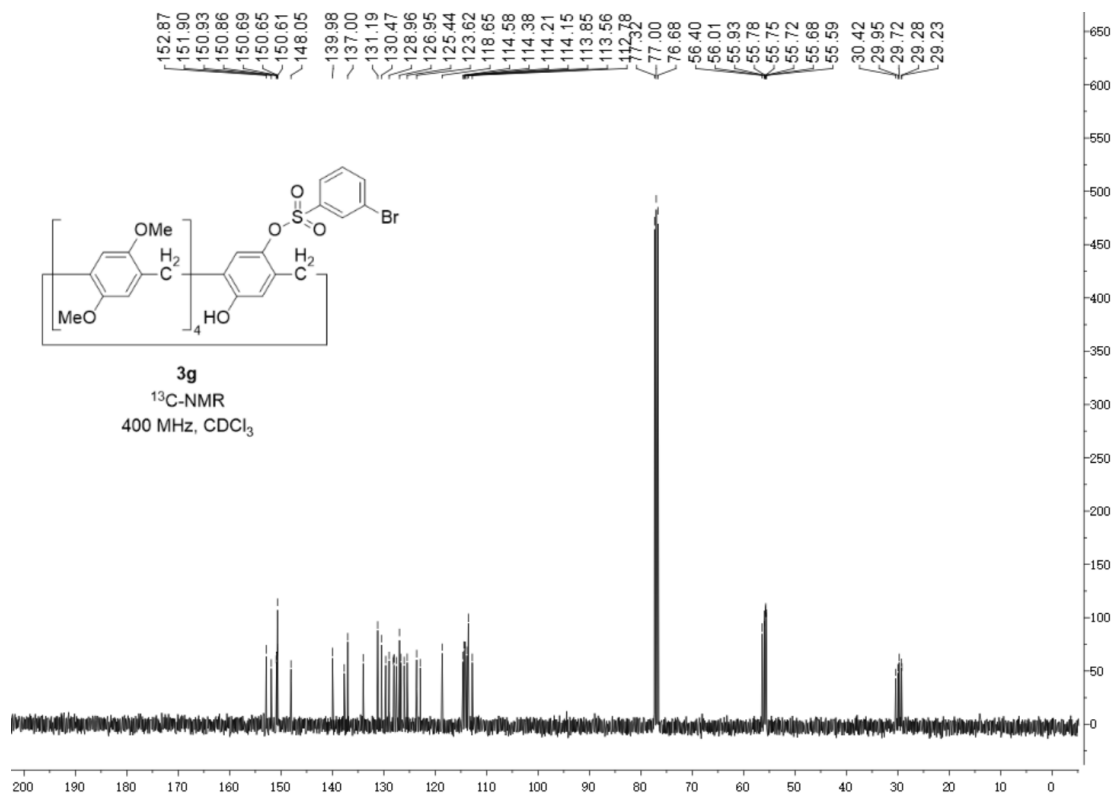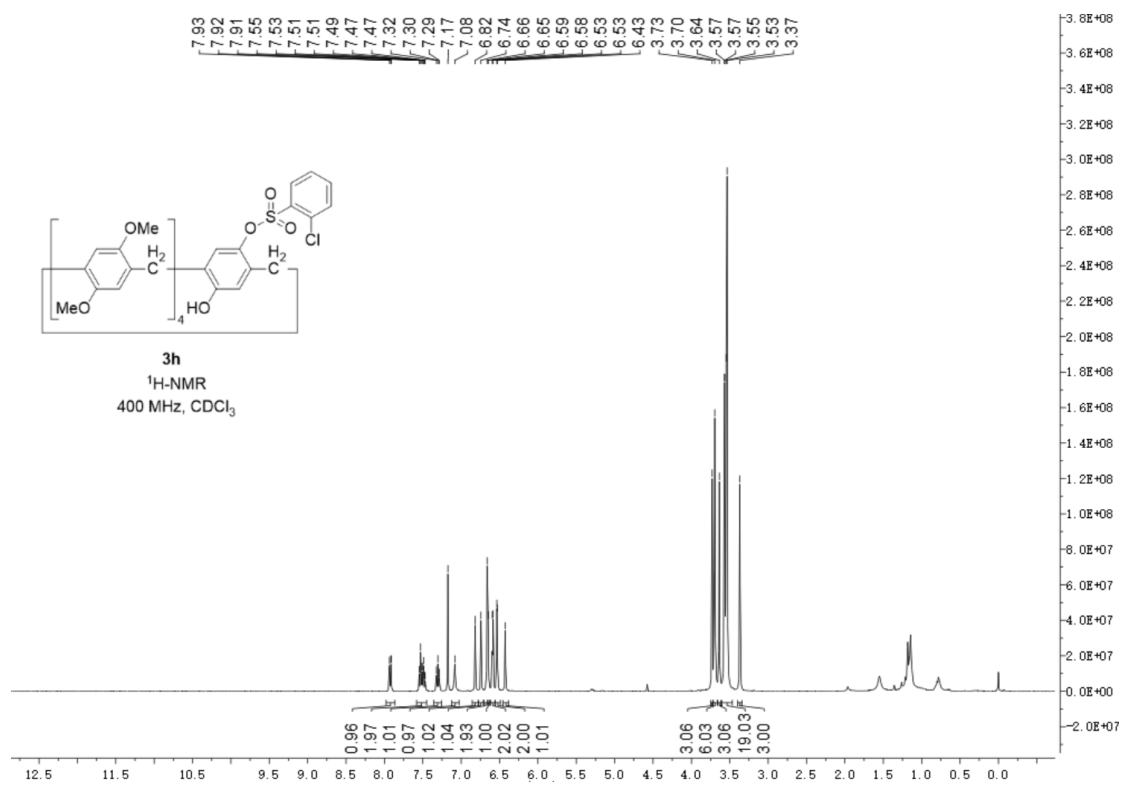

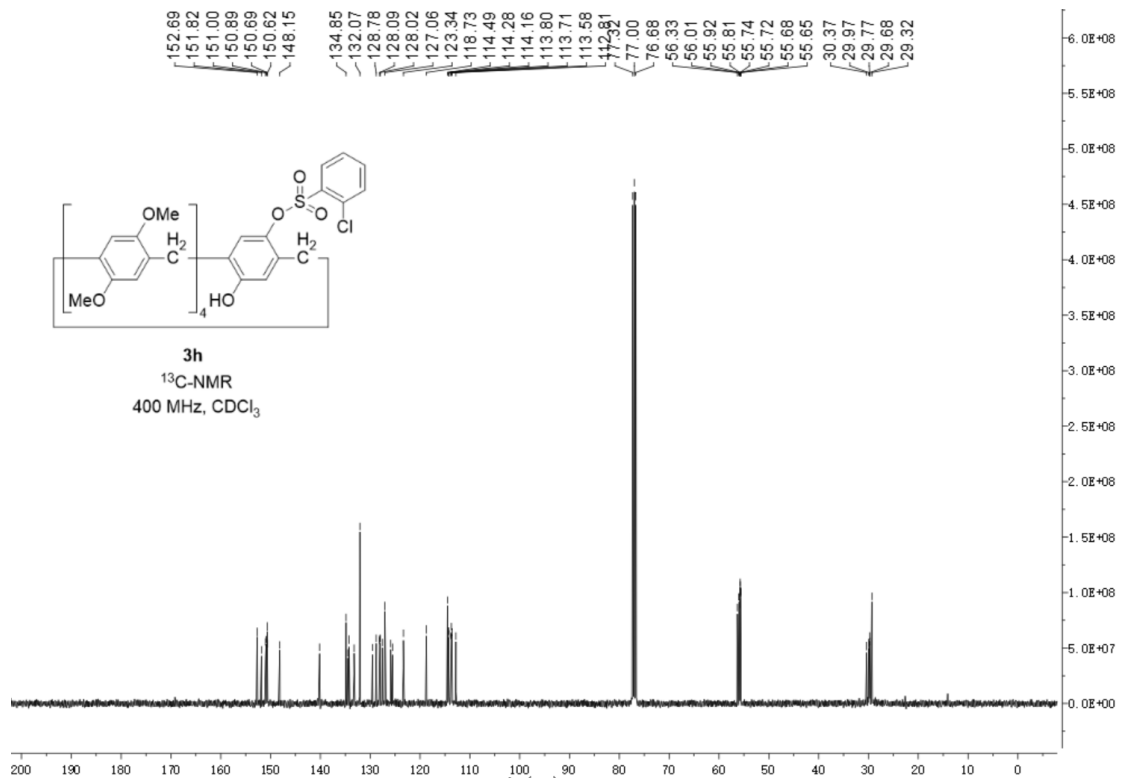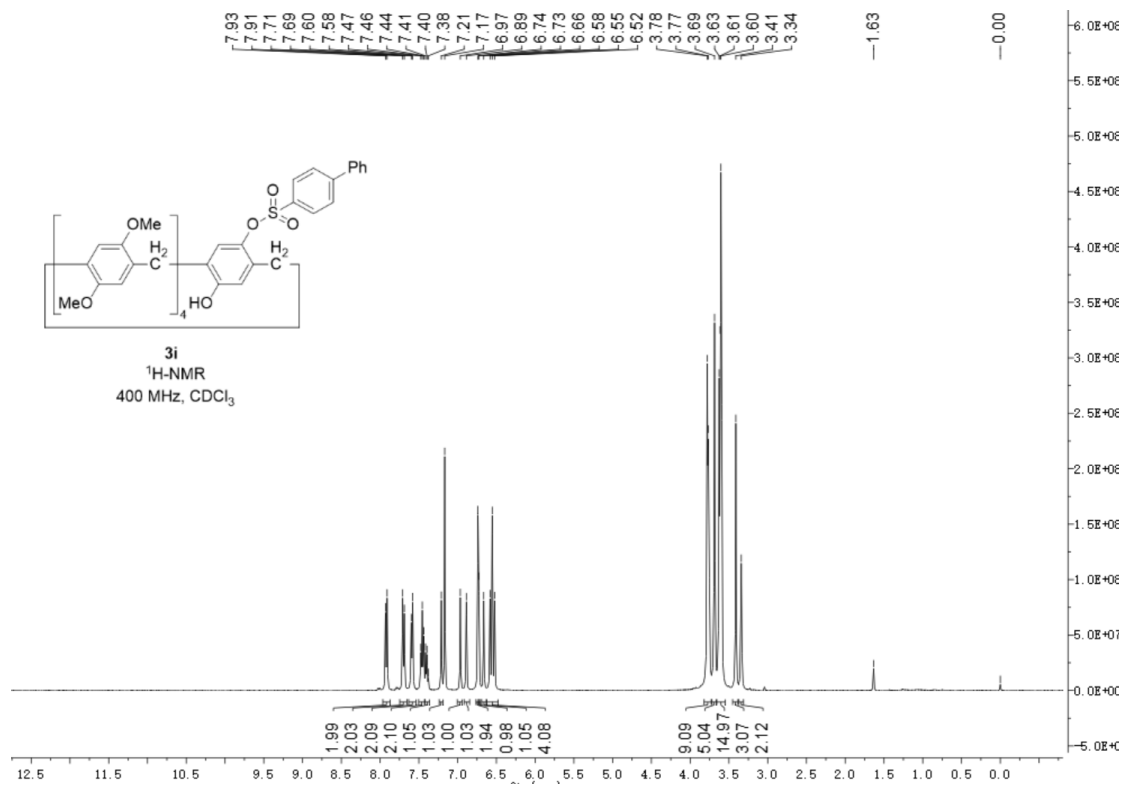

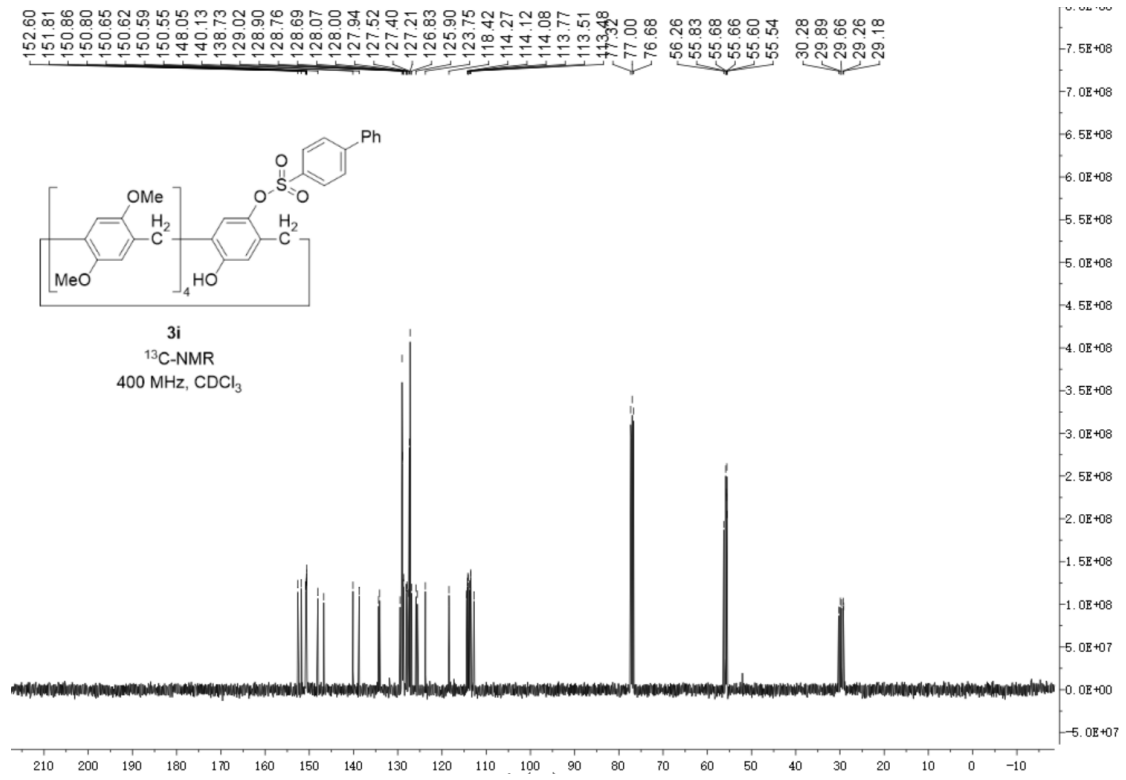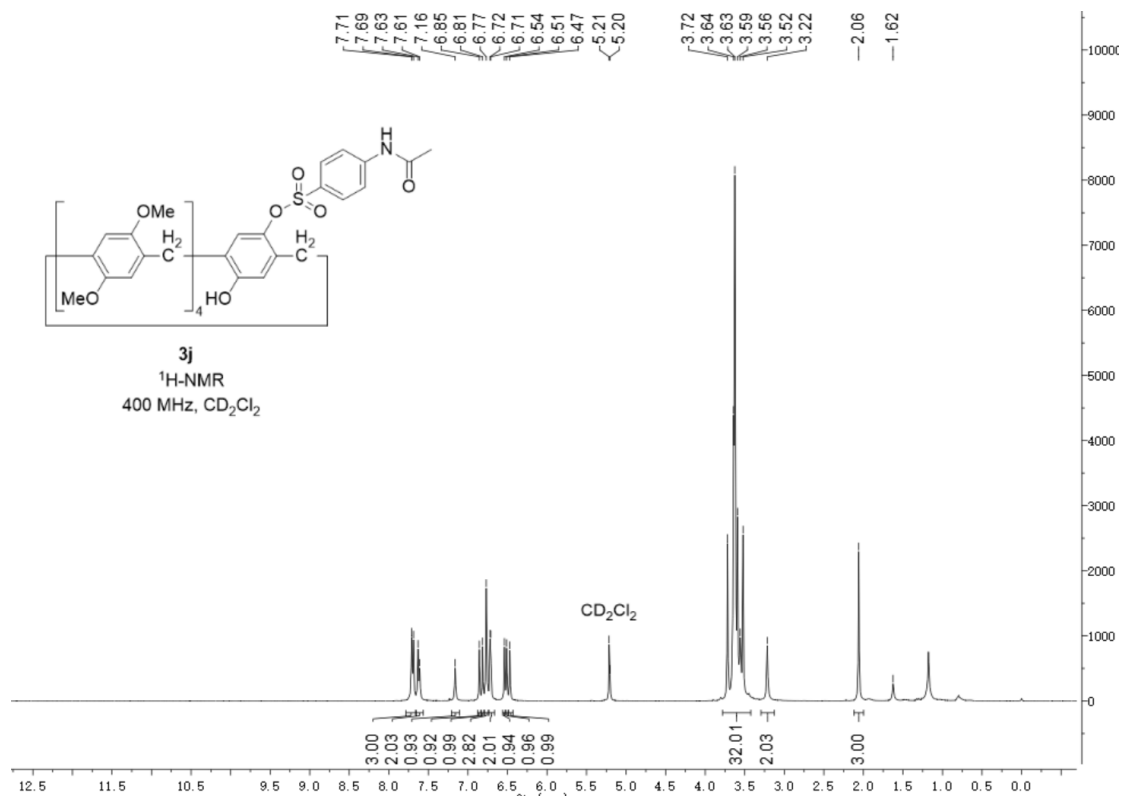

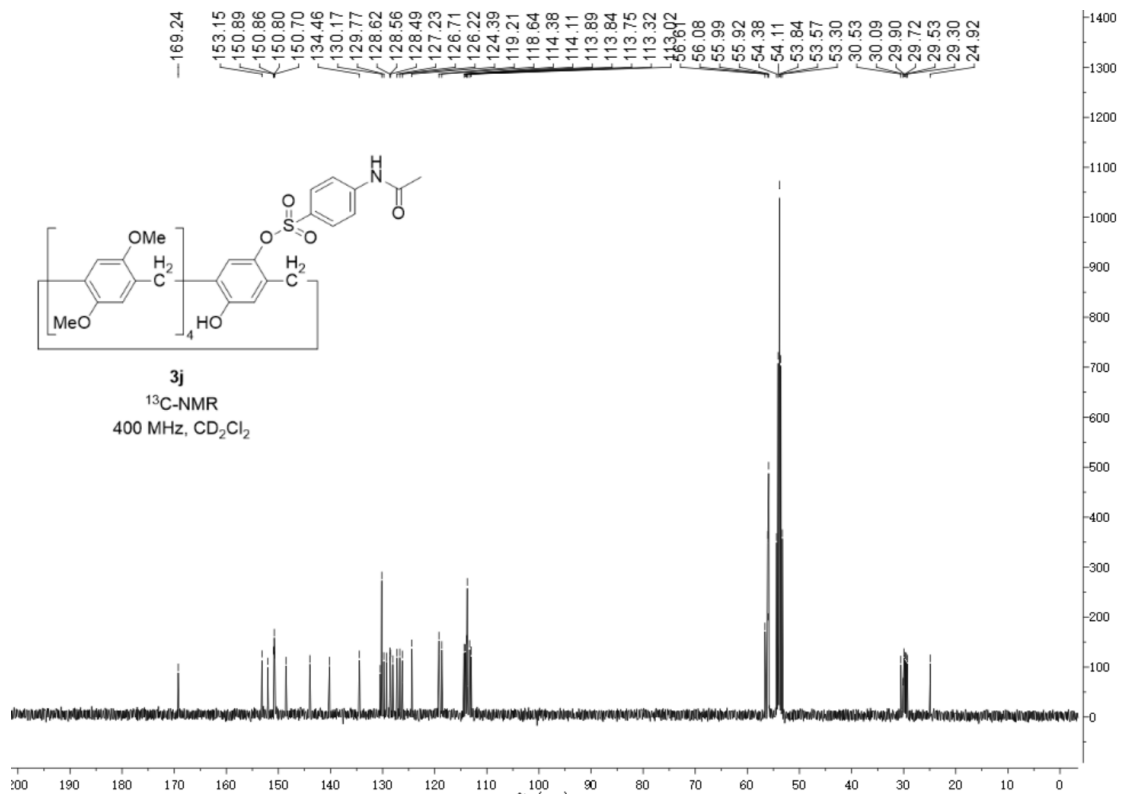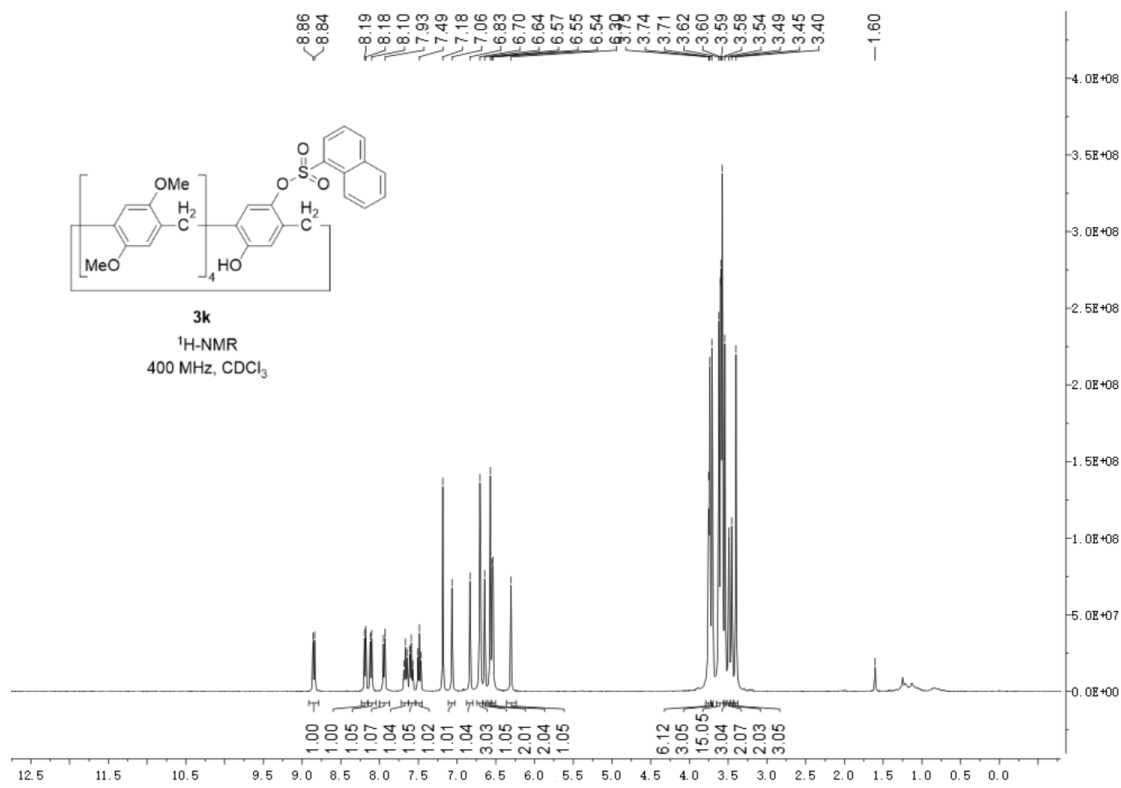

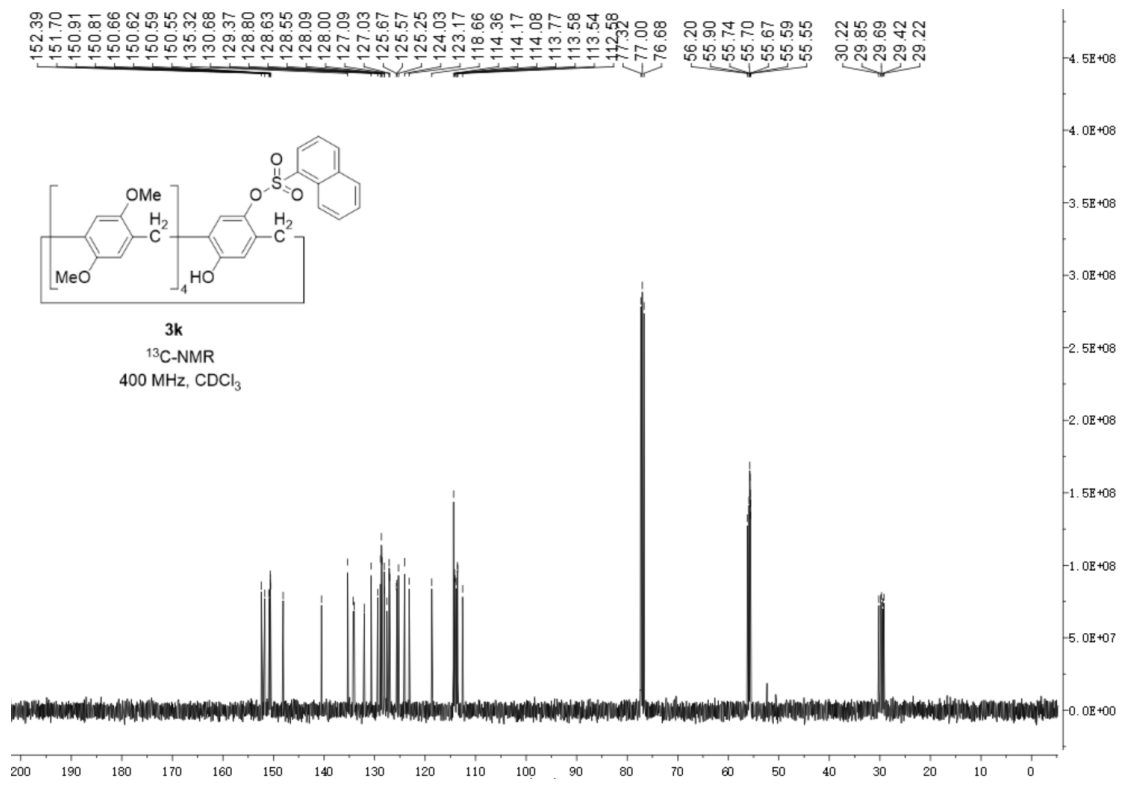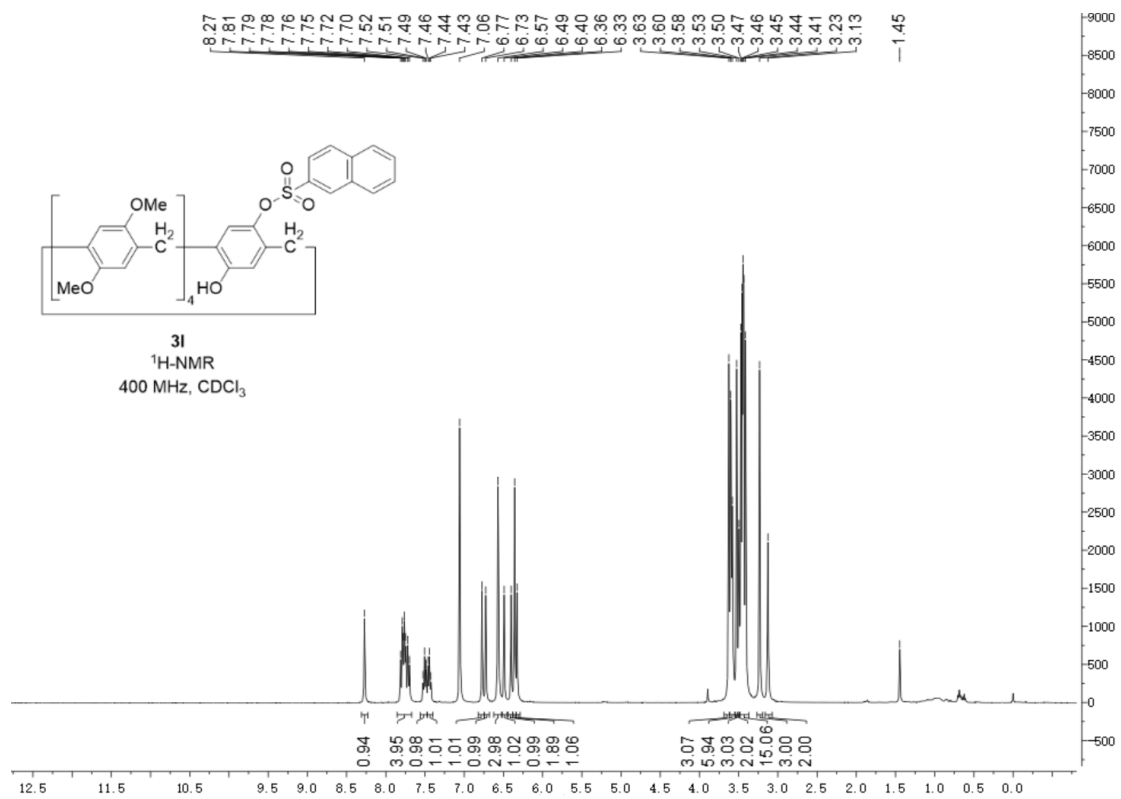



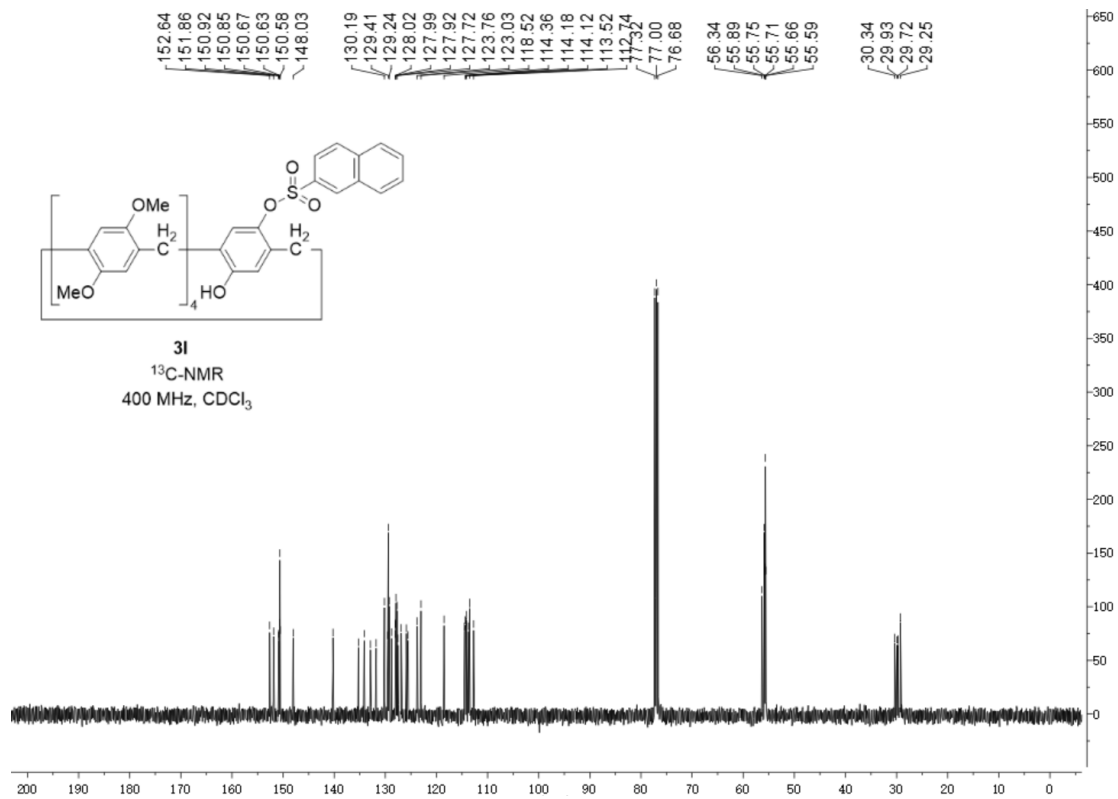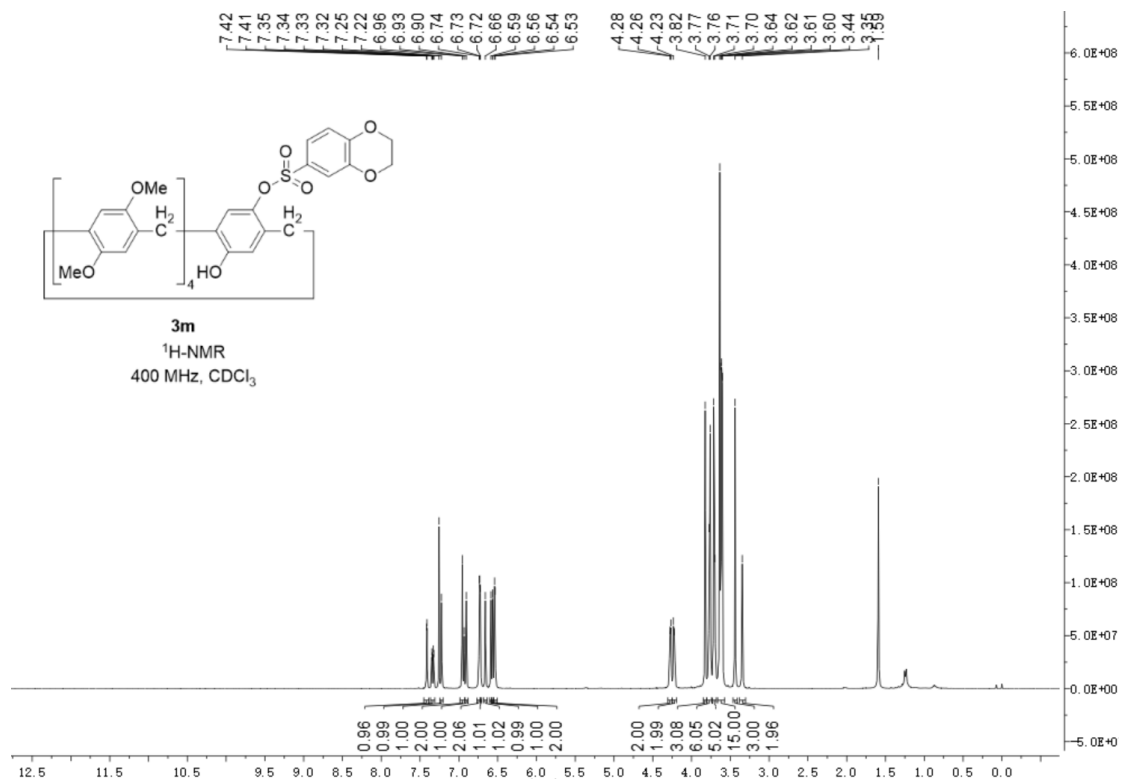

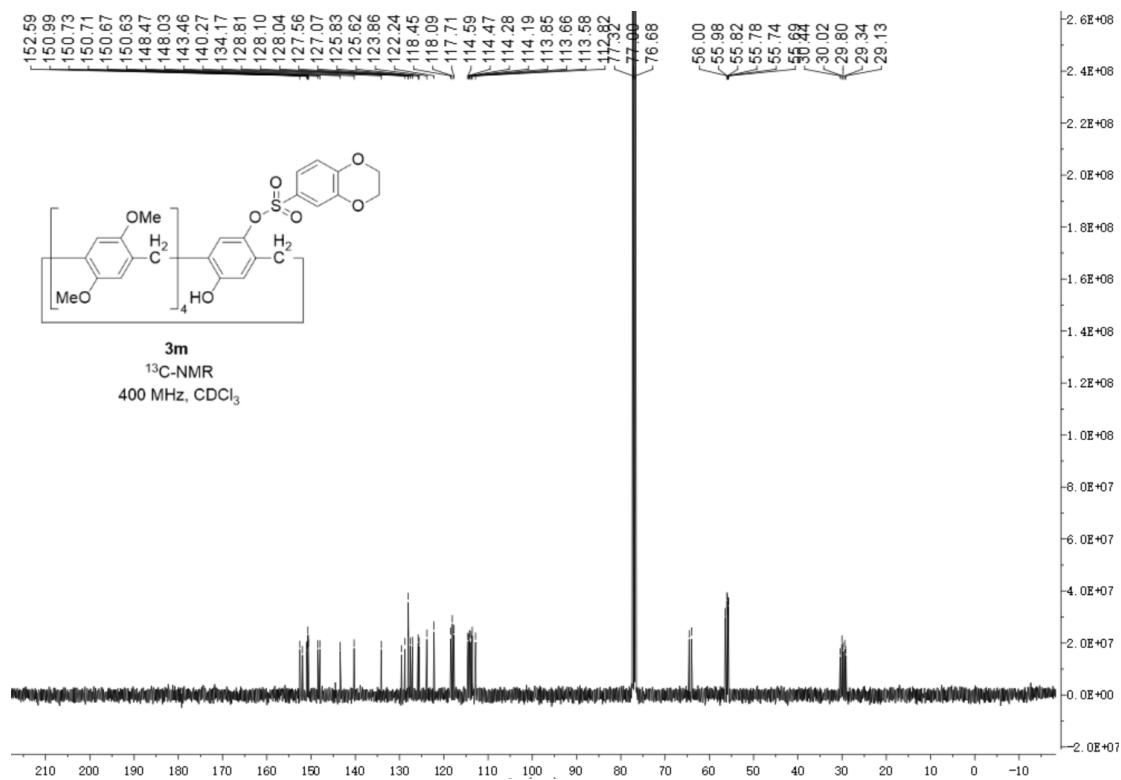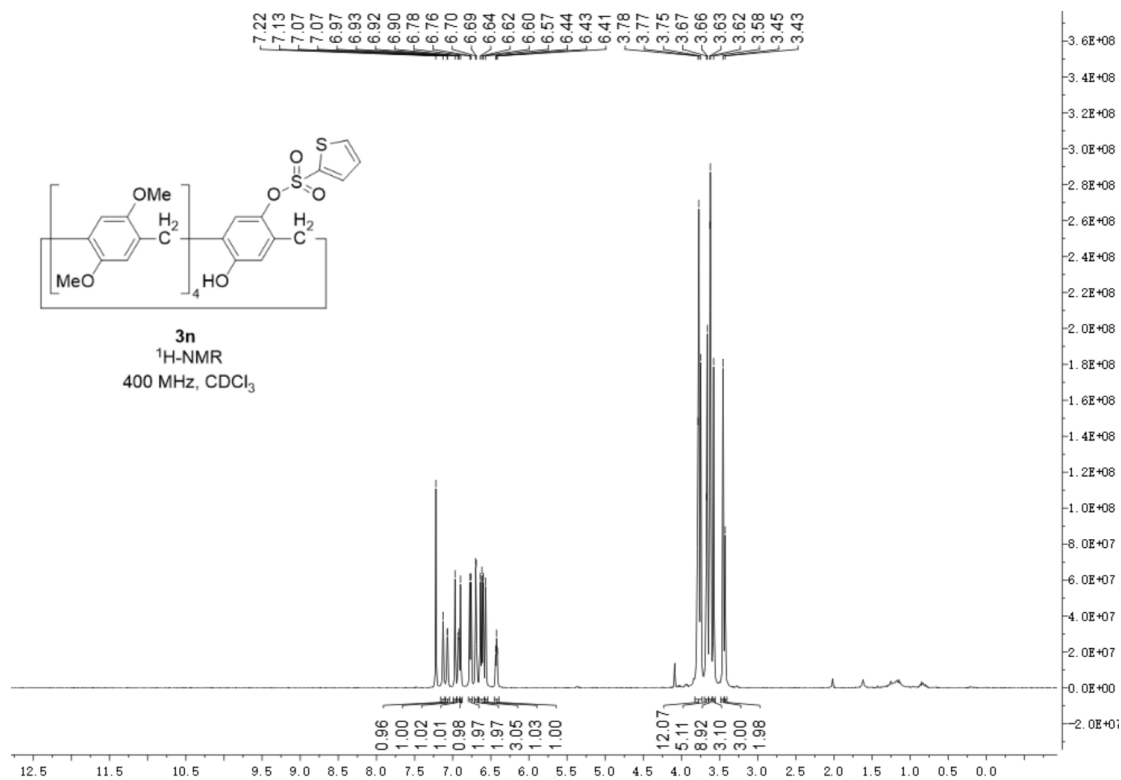

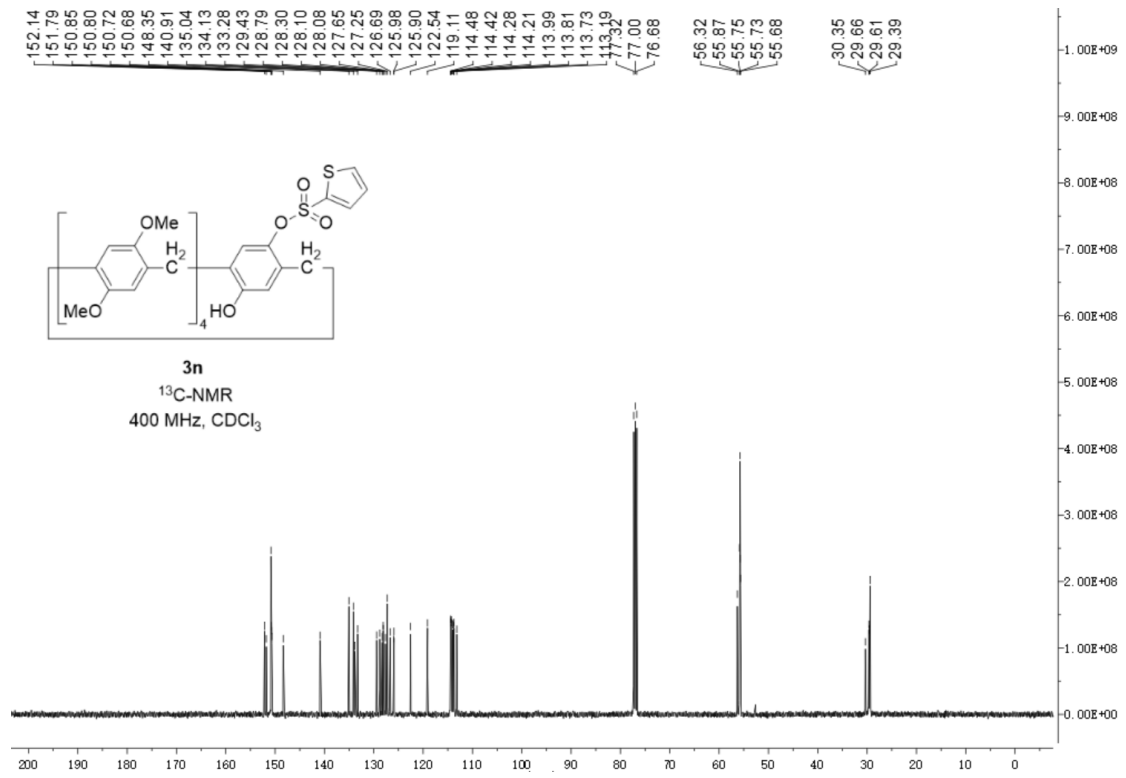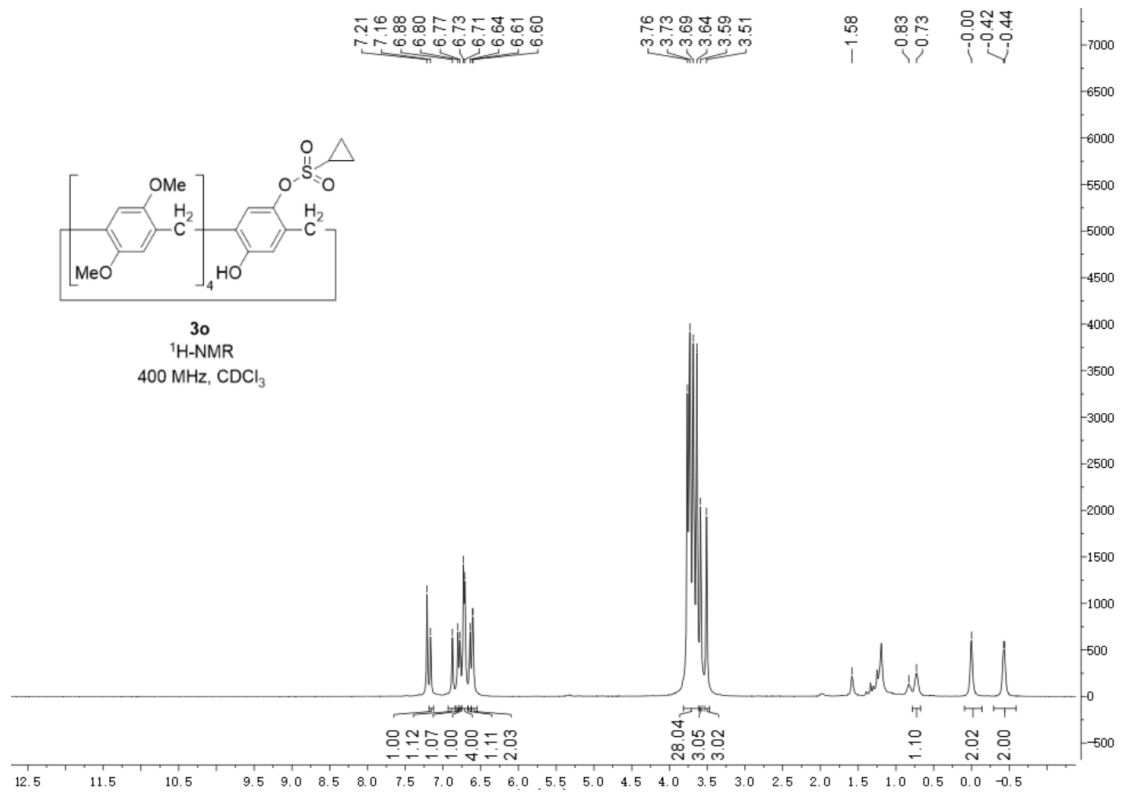

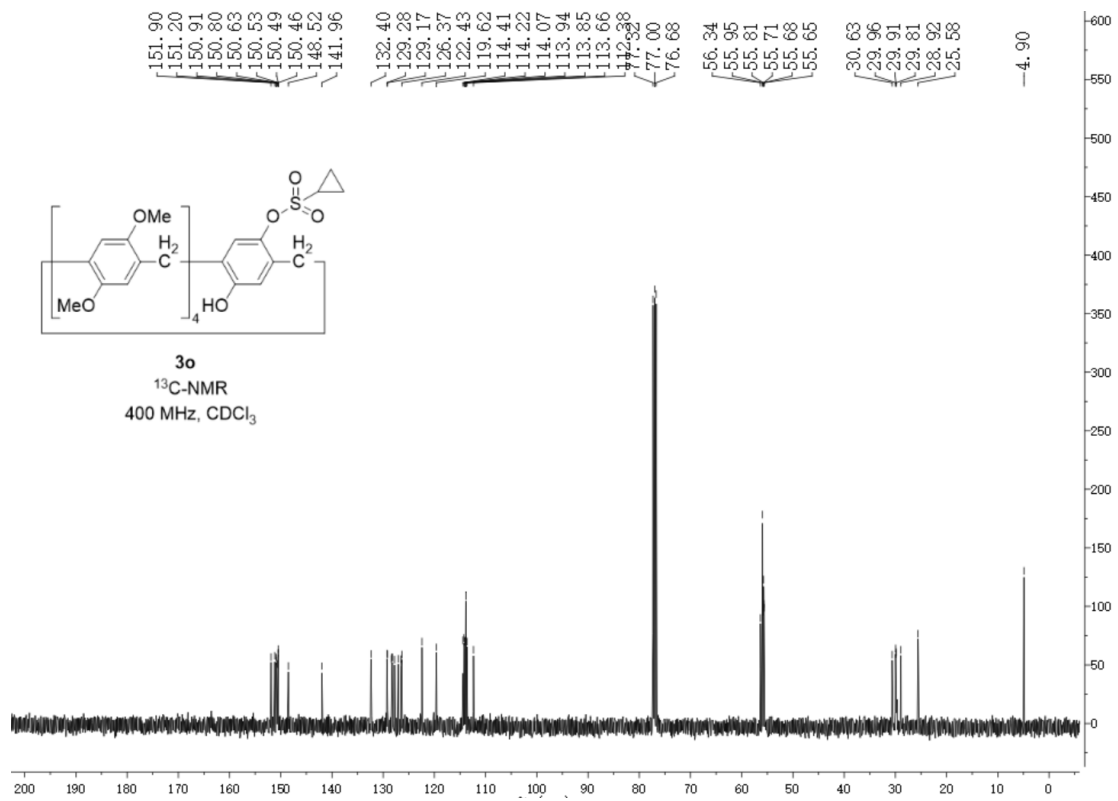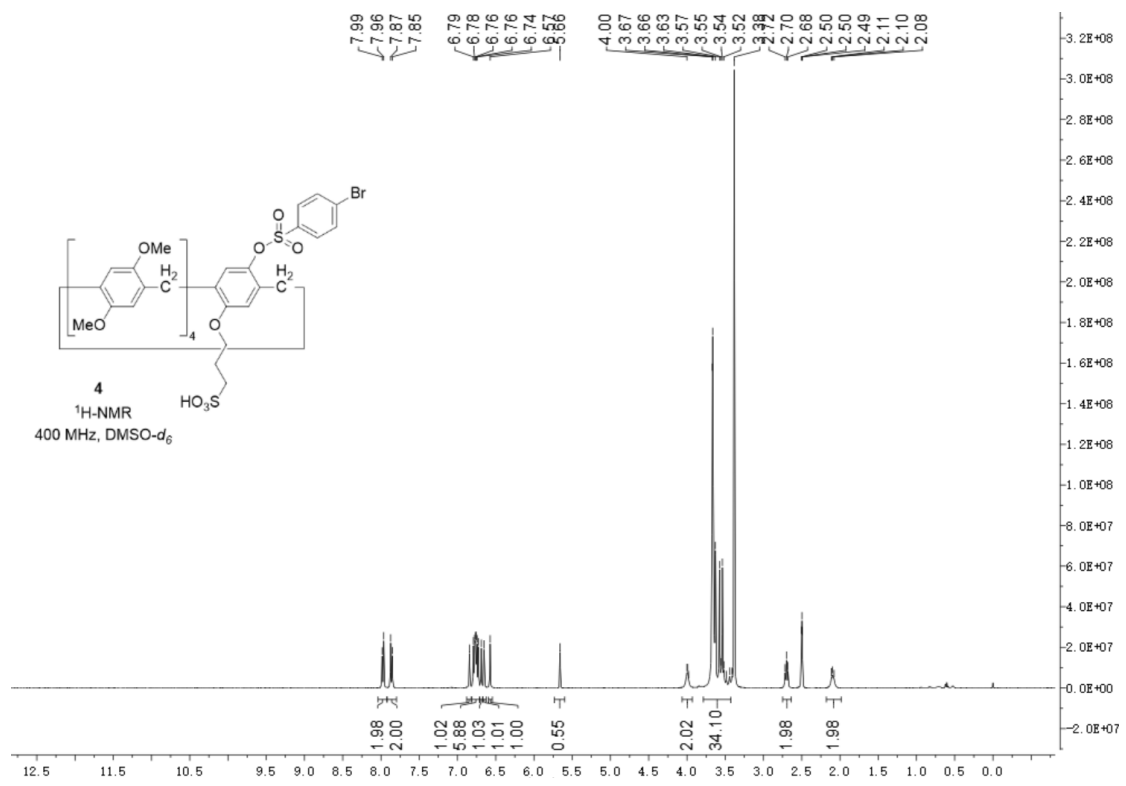

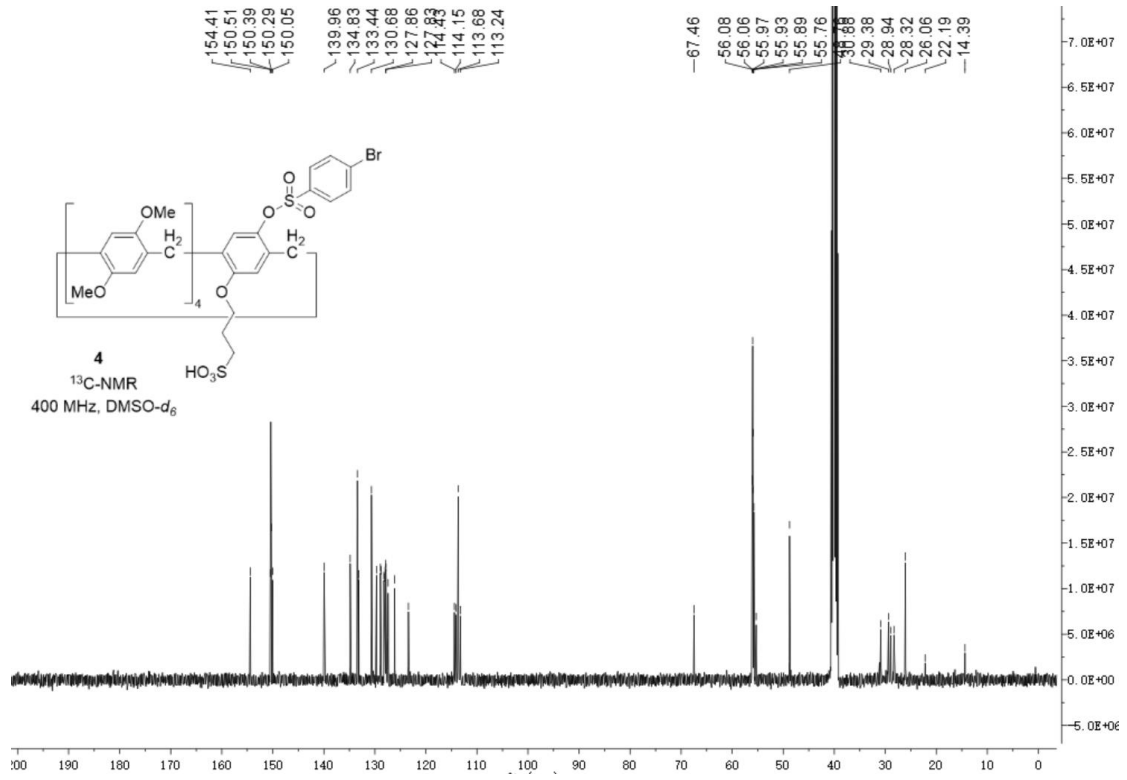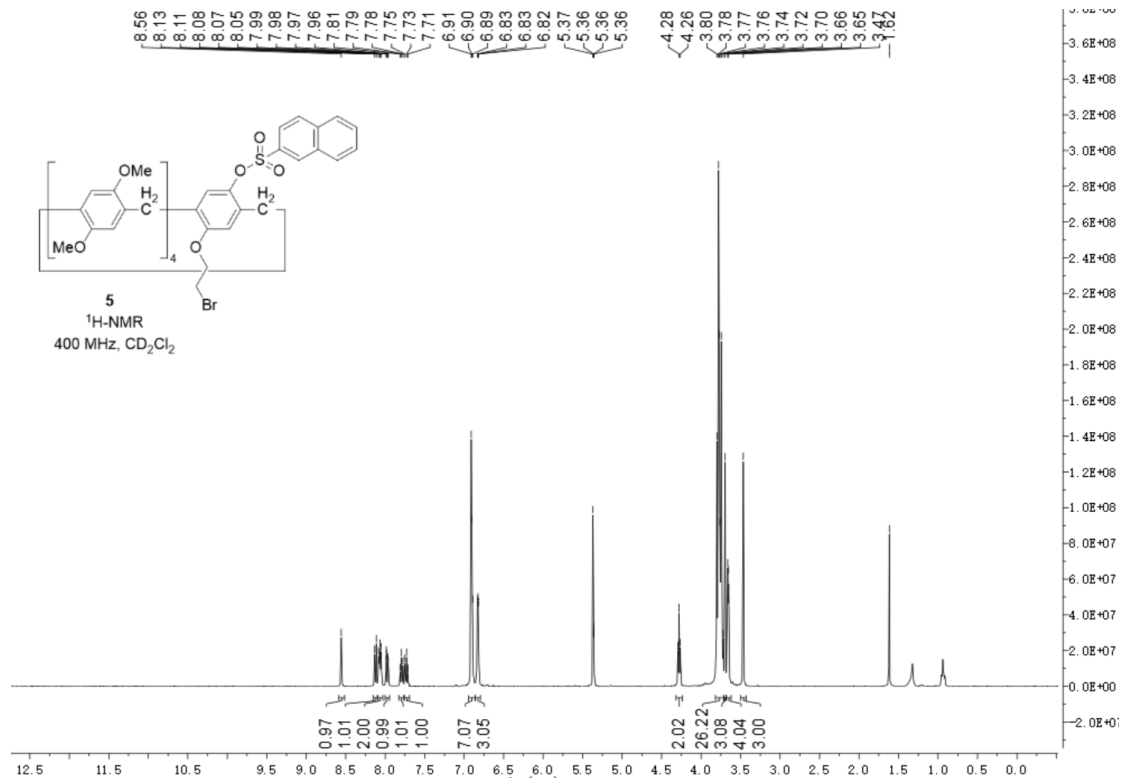

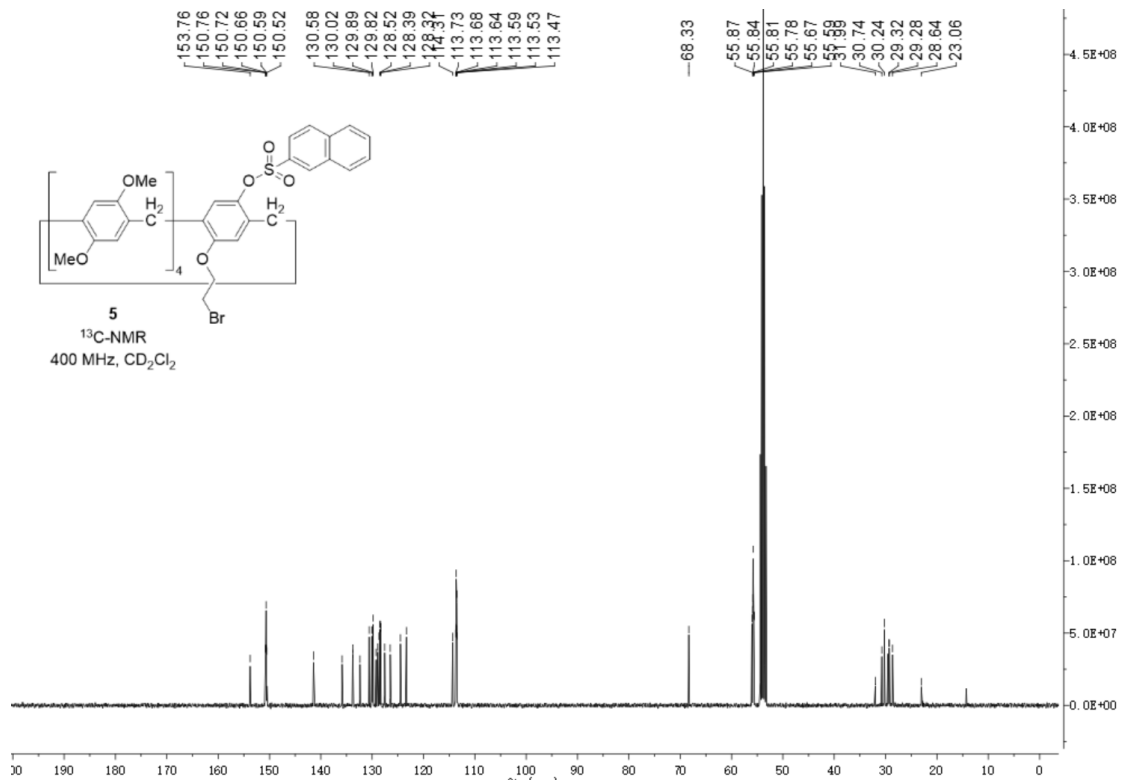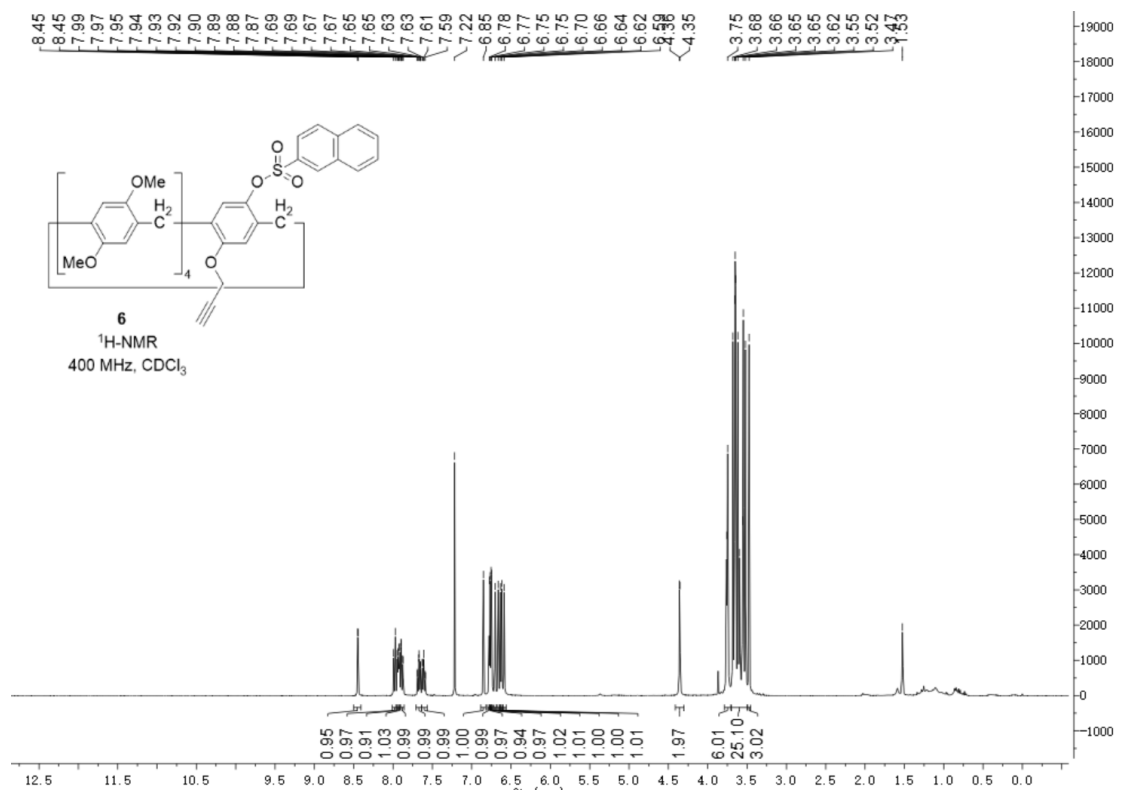

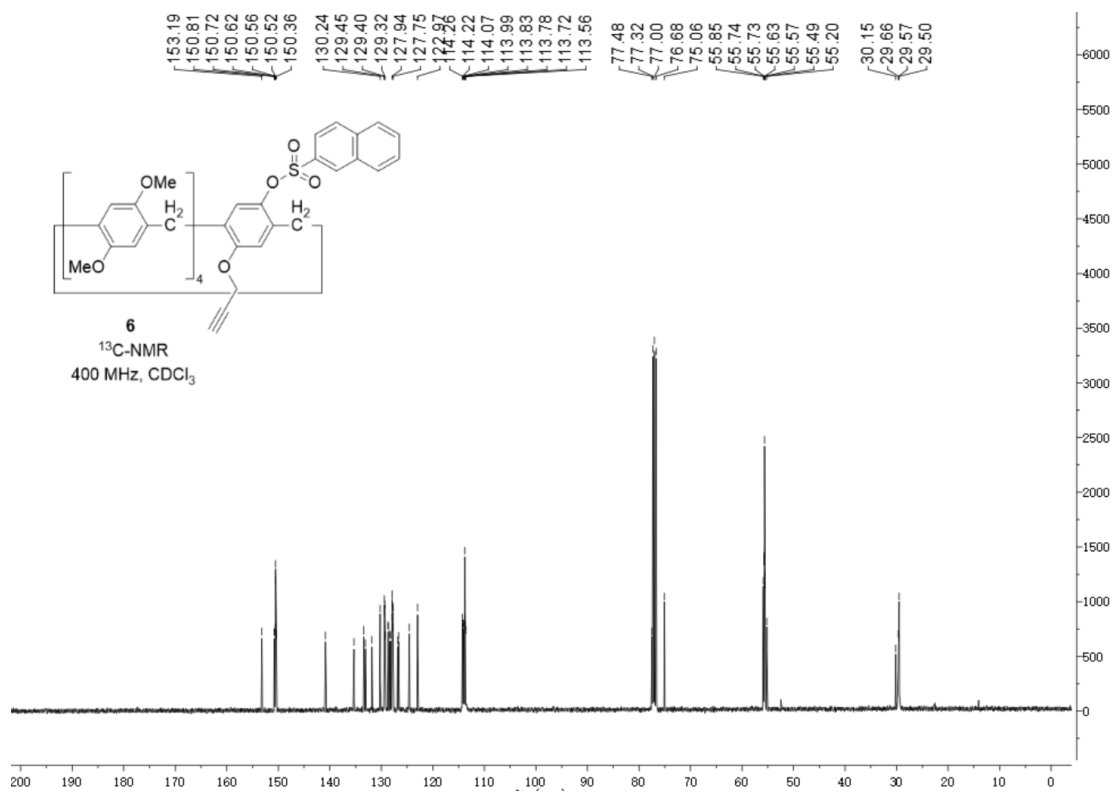

Supplement: d4ob01908c1.pdf [file d4ob01908c1.pdf]
